# Supplementary material for: The Drug Discovery and Development Industry in India—Two Decades of Proprietary Small‐Molecule R&D
Source: PubMed Central journal article supplement — ChemMedChem. 2017 Jun 1;12(11):786–818. doi: 10.1002/cmdc.201700043 (PMC5488177; doi:10.1002/cmdc.201700043), 2017-06-01
Supplement: CMDC-12-786-s001.pdf [file CMDC-12-786-s001.pdf]

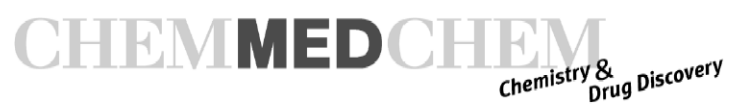

## Supporting Information

# **The Drug Discovery and Development Industry in India— Two Decades of Proprietary Small-Molecule R&D**

Edmond Differding\*<sup>[a]</sup>

cmdc\_201700043\_sm\_miscellaneous\_information.pdf

## **Supporting Information**

**1. Table 5:** Top-100 pharmaceutical and biotechnology companies in India by revenue (p. 2)

**2. Table 6:** Development compounds at Indian pharmaceutical and biotechnology companies (p. 6)

Table 6.a.: Proprietary development compounds from Indian companies (p. 6)

Table 6.b.: Development compounds in-licensed by Indian companies (p. 21)

**3. Table 7:** Development timelines of proprietary compounds at Indian companies (p. 22)

**4. Table 8:** Figures used for analysis and calculations (p. 29)

**5. Figure 7:** Additional structures described in Supporting Information Tables only (p. 39)

**6. Bibliography:** Additional references from Supporting Information Tables only (p. 40)

**1. Table 5: Top-100 pharmaceutical and biotechnology companies in India by revenue**

| #  | Public Company <sup>(a, b)</sup> | Private Company <sup>(a, b)</sup> | Revenue (Cr INR) | Revenue (M\$ US) <sup>(c)</sup> | Fiscal Year | Reference                                                                                                                                                                                                                                                           |
|----|----------------------------------|-----------------------------------|------------------|---------------------------------|-------------|---------------------------------------------------------------------------------------------------------------------------------------------------------------------------------------------------------------------------------------------------------------------|
| 1  | Sun Pharma                       |                                   | 28.886,70        | 4.356,11                        | 2015-16     | Company Annual report 2016                                                                                                                                                                                                                                          |
| 2  | Dr Reddy's Laboratories          |                                   | 15.967,10        | 2.407,84                        | 2015-16     | Company Annual report 2016                                                                                                                                                                                                                                          |
| 3  | Lupin Ltd                        |                                   | 14.396,17        | 2.170,94                        | 2015-16     | Company Annual report 2016                                                                                                                                                                                                                                          |
| 4  | Aurobindo Pharma                 |                                   | 14.062,35        | 2.120,60                        | 2015-16     | Company Annual report 2016                                                                                                                                                                                                                                          |
| 5  | Cipla                            |                                   | 13.887,16        | 2.094,18                        | 2015-16     | Company Annual report 2016                                                                                                                                                                                                                                          |
| 6  | Cadila Healthcare                |                                   | 9.931,70         | 1.497,70                        | 2015-16     | Company Annual report 2016                                                                                                                                                                                                                                          |
| 7  |                                  | Hetero Drugs Ltd                  | 7.957,56         | 1.200,00                        | 2014-15     | <a href="http://www.prnewswire.com/news-releases/hetero-announces-the-launch-of-biosimilar-rituximab-maball-in-india-520727741.html">http://www.prnewswire.com/news-releases/hetero-announces-the-launch-of-biosimilar-rituximab-maball-in-india-520727741.html</a> |
| 8  | Glenmark Pharmaceuticals         |                                   | 7.580,00         | 1.143,06                        | 2015-16     | Company Annual report 2016                                                                                                                                                                                                                                          |
| 9  | Torrent Pharma                   |                                   | 6.892,00         | 1.039,31                        | 2015-16     | Company Annual report 2016                                                                                                                                                                                                                                          |
| 10 |                                  | Intas Pharmaceuticals             | 6.569,20         | 990,64                          | 2015-16     | Company website acc Nov 22 2016<br><a href="http://intaspharma.com/index.php?option=com_content&amp;view=article&amp;id=59&amp;Itemid=41">http://intaspharma.com/index.php?option=com_content&amp;view=article&amp;id=59&amp;Itemid=41</a>                          |
| 11 | Jubilant Lifesciences            |                                   | 5.816,00         | 877,05                          | 2015-16     | Company Annual report 2016                                                                                                                                                                                                                                          |
| 12 | Alkem Laboratories Ltd           |                                   | 5.156,05         | 777,53                          | 2015-16     | Company Annual report 2016                                                                                                                                                                                                                                          |
| 13 | Wockhardt                        |                                   | 4.558,00         | 687,35                          | 2015-16     | Company Annual report 2016                                                                                                                                                                                                                                          |
| 14 |                                  | Serum Institute of India          | 4.153,00         | 626,27                          | 2015-16     | Biospectrum survey<br><a href="http://www.biospectrumindia.com/category/top20/top-biotech-companies">http://www.biospectrumindia.com/category/top20/top-biotech-companies</a>                                                                                       |
| 15 |                                  | Mankind Pharma                    | 4.000,00         | 603,20                          | 2015-16     | Mankind website Nov 22 2016<br><a href="https://www.mankindpharma.com/mediakit/financial_highlights">https://www.mankindpharma.com/mediakit/financial_highlights</a>                                                                                                |
| 16 | Divis Laboratories               |                                   | 3.861,19         | 582,27                          | 2015-16     | Company Annual report 2016                                                                                                                                                                                                                                          |
| 17 | Piramal Enterprises (Healthcare) |                                   | 3.700,20         | 557,99                          | 2015-16     | Company Annual report 2016 (Piramal Healthcare = 54% of Piramal Enterprises revenue)                                                                                                                                                                                |
| 18 | Biocon                           |                                   | 3.569,90         | 538,34                          | 2015-16     | Company Annual report 2016                                                                                                                                                                                                                                          |
| 19 | Strides Shasun                   |                                   | 3.156,35         | 475,98                          | 2015-16     | Company Annual report 2016                                                                                                                                                                                                                                          |
| 20 | Alembic Pharma                   |                                   | 3.154,22         | 475,66                          | 2015-16     | Company Annual report 2016                                                                                                                                                                                                                                          |
| 21 |                                  | Macleods Pharmaceuticals          | 2.981,00         | 449,53                          | 2013-14     | Business Standard 2016 - <a href="http://bsmedia.business-standard.com/media/bs/data/general-file-upload/2016-02/bs-1000-03.pdf">http://bsmedia.business-standard.com/media/bs/data/general-file-upload/2016-02/bs-1000-03.pdf</a>                                  |
| 22 | Ipca Labs                        |                                   | 2.901,95         | 437,61                          | 2015-16     | Company Annual report 2016                                                                                                                                                                                                                                          |
| 23 |                                  | Micro Labs                        | 2.700,00         | 407,16                          | 2015-16     | Company website Nov 22, 2016 - <a href="http://www.microlabsltd.com/about-us/our-history">http://www.microlabsltd.com/about-us/our-history</a>                                                                                                                      |
| 24 |                                  | USV Limited                       | 2.544,50         | 383,71                          | 2015-16     | Company website Nov 22 2016 - <a href="http://www.usvindia.com/aboutus.php">http://www.usvindia.com/aboutus.php</a>                                                                                                                                                 |
| 25 |                                  | Arch Pharmalabs Ltd               | 2.285,98         | 344,73                          | 2012-13     | undergoing corporate debt restructuring - <a href="http://www.careratings.com/upload/CompanyFiles/PR/ARCH">http://www.careratings.com/upload/CompanyFiles/PR/ARCH</a>                                                                                               |

|    |                                           |                            |          |        |         |                                                                                                                                                                                                                                                                                                          |
|----|-------------------------------------------|----------------------------|----------|--------|---------|----------------------------------------------------------------------------------------------------------------------------------------------------------------------------------------------------------------------------------------------------------------------------------------------------------|
|    |                                           |                            |          |        |         | <a href="#">%20PHARMALABS%20LIMITED-04-02-2015.pdf</a>                                                                                                                                                                                                                                                   |
| 26 |                                           | Emcure Pharmaceuticals Ltd | 2.059,88 | 310,63 | 2014-15 | <a href="http://www.careratings.com/upload/CompanyFiles/PR/EMCURE%20PHARMACEUTICALS%20LIMITED-03-09-2016.pdf">http://www.careratings.com/upload/CompanyFiles/PR/EMCURE%20PHARMACEUTICALS%20LIMITED-03-09-2016.pdf</a>                                                                                    |
| 27 |                                           | Relax Pharmaceuticals      | 1.949,20 | 293,94 | 2013-14 | Business Standard 2016 - <a href="http://bsmedia.business-standard.com/media/bs/data/general-file-upload/2016-02/bs-1000-03.pdf">http://bsmedia.business-standard.com/media/bs/data/general-file-upload/2016-02/bs-1000-03.pdf</a>                                                                       |
| 28 |                                           | Aristo Pharmaceuticals     | 1.823,61 | 275,00 | 2013-14 | IPHEX 2016 (company's own info) - <a href="http://www.iphex-india.com/exhibitor/view_approved">http://www.iphex-india.com/exhibitor/view_approved</a>                                                                                                                                                    |
| 29 | Laurus Labs                               |                            | 1.791,36 | 270,14 | 2015-16 | Laurus AR 2016 from website acc Nov 22, 2016 - <a href="http://www.lauruslabs.com/sites/all/themes/lauruslab/pdf/AnnualReport-2015-16.pdf">http://www.lauruslabs.com/sites/all/themes/lauruslab/pdf/AnnualReport-2015-16.pdf</a>                                                                         |
| 30 | Ajanta Pharma Ltd                         |                            | 1.744,16 | 263,02 | 2015-16 | Company Annual report 2016                                                                                                                                                                                                                                                                               |
| 31 |                                           | MSN Laboratories           | 1.657,82 | 250,00 | 2015-16 | Company website accessed Nov 22 2016 - <a href="http://www.msnlabs.com/who_weare.html">http://www.msnlabs.com/who_weare.html</a>                                                                                                                                                                         |
| 32 | Dishman Pharmaceuticals and Chemicals Ltd |                            | 1.622,59 | 244,69 | 2015-16 | Company Annual report 2016                                                                                                                                                                                                                                                                               |
| 33 | Granules India                            |                            | 1.437,21 | 216,73 | 2015-16 | Company Annual report 2016                                                                                                                                                                                                                                                                               |
| 34 |                                           | Cadila Pharmaceuticals     | 1.390,00 | 209,61 | 2014-15 | <a href="http://www.careratings.com/upload/CompanyFiles/PR/CADILA%20PHARMACEUTICALS%20LIMITED-02-26-2016.pdf">http://www.careratings.com/upload/CompanyFiles/PR/CADILA%20PHARMACEUTICALS%20LIMITED-02-26-2016.pdf</a>                                                                                    |
| 35 | Vivimed Labs                              |                            | 1.356,44 | 204,55 | 2015-16 | Company Annual report 2016                                                                                                                                                                                                                                                                               |
| 36 | Unichem Laboratories Ltd                  |                            | 1.353,75 | 204,15 | 2015-16 | Company Annual report 2016                                                                                                                                                                                                                                                                               |
| 37 | JB Chemicals & Pharmaceuticals Ltd        |                            | 1.309,30 | 197,44 | 2015-16 | Company Annual report 2016                                                                                                                                                                                                                                                                               |
| 38 | Natco Pharma                              |                            | 1.152,38 | 173,78 | 2015-16 | Company Annual report 2016                                                                                                                                                                                                                                                                               |
| 39 | Aarti Drugs                               |                            | 1.139,84 | 171,89 | 2015-16 | Company Annual report 2016                                                                                                                                                                                                                                                                               |
| 40 |                                           | Gland Pharma               | 1.120,70 | 169,00 | 2014-15 | BusinessToday Aug 28, 2016 - <a href="http://www.businesstoday.in/magazine/corporate/chinese-pharma-company-buys-an-equally-less-known-indian-firm/story/235885.html">http://www.businesstoday.in/magazine/corporate/chinese-pharma-company-buys-an-equally-less-known-indian-firm/story/235885.html</a> |
| 41 | Syngene                                   |                            | 1.113,10 | 167,86 | 2015-16 | Company Annual report 2016                                                                                                                                                                                                                                                                               |
| 42 | FDC Ltd                                   |                            | 1.037,87 | 156,51 | 2015-16 | Company Annual report 2016                                                                                                                                                                                                                                                                               |
| 43 |                                           | Biological E               | 1.018,00 | 153,51 | 2015-16 | Biospectrum survey <a href="http://www.biospectrumindia.com/category/top20/top-biotech-companies">http://www.biospectrumindia.com/category/top20/top-biotech-companies</a>                                                                                                                               |
| 44 | Elder Pharmaceuticals                     |                            | 1.008,91 | 152,14 | 2013-14 | Company Annual report 2014 - facing bankruptcy                                                                                                                                                                                                                                                           |
| 45 | Indoco Remedies Ltd                       |                            | 1.004,87 | 151,53 | 2015-16 | Company Annual report 2016                                                                                                                                                                                                                                                                               |
| 46 | Hikal                                     |                            | 927,50   | 139,87 | 2015-16 | Company Annual report 2016                                                                                                                                                                                                                                                                               |
| 47 | Orchid Pharma                             |                            | 898,35   | 135,47 | 2015-16 | Company Annual report 2016                                                                                                                                                                                                                                                                               |
| 48 | Dr Lal PathLabs Ltd                       |                            | 796,35   | 120,09 | 2015-16 | Company Annual report 2016                                                                                                                                                                                                                                                                               |
| 49 | Claris Lifesciences Ltd                   |                            | 794,68   | 119,84 | 2015-16 | Company Annual report 2016                                                                                                                                                                                                                                                                               |
| 50 | Shilpa medicare Ltd                       |                            | 724,01   | 109,18 | 2015-16 | Company Annual report 2016                                                                                                                                                                                                                                                                               |
| 51 | Panacea Biotec                            |                            | 673,43   | 101,55 | 2015-16 | Company Annual report 2016                                                                                                                                                                                                                                                                               |

|    |                                  |                              |        |        |         |                                                                                                                                                                                                                                                                                       |
|----|----------------------------------|------------------------------|--------|--------|---------|---------------------------------------------------------------------------------------------------------------------------------------------------------------------------------------------------------------------------------------------------------------------------------------|
| 52 | Ind-Swift Laboratories           |                              | 667,43 | 100,65 | 2015-16 | Company Annual report 2016                                                                                                                                                                                                                                                            |
| 53 |                                  | GVK Biosciences              | 663,13 | 100,00 | 2014-15 | <a href="http://timesofindia.indiatimes.com/business/india-business/ChrysCap-buys-10-stake-in-research-firm-GVK-Bio/articleshow/50005374.cms">http://timesofindia.indiatimes.com/business/india-business/ChrysCap-buys-10-stake-in-research-firm-GVK-Bio/articleshow/50005374.cms</a> |
| 54 | Sequent Scientific               |                              | 645,12 | 97,28  | 2015-16 | Company Annual report 2016                                                                                                                                                                                                                                                            |
| 55 | SMS Pharmaceuticals              |                              | 606,80 | 91,51  | 2015-16 | Company Annual report 2016                                                                                                                                                                                                                                                            |
| 56 | Sterling Biotech                 |                              | 531,84 | 80,20  | 2015-16 | Company Annual report 2016                                                                                                                                                                                                                                                            |
| 57 | TTK Healthcare                   |                              | 524,45 | 79,09  | 2015-16 | Company Annual report 2016                                                                                                                                                                                                                                                            |
| 58 |                                  | Reliance Life Sciences       | 522,23 | 78,75  | 2013-14 | <a href="http://www.careratings.com/upload/CompanyFiles/PR/RELIANCE%20LIFE%20SCIENCES%20PVT.%20LTD.-02-27-2015.pdf">http://www.careratings.com/upload/CompanyFiles/PR/RELIANCE%20LIFE%20SCIENCES%20PVT.%20LTD.-02-27-2015.pdf</a>                                                     |
| 59 | Suven Life Sciences              |                              | 518,87 | 78,25  | 2015-16 | Company Annual report 2016                                                                                                                                                                                                                                                            |
| 60 | Neuland Laboratories Ltd         |                              | 517,49 | 78,04  | 2015-16 | Company Annual report 2016                                                                                                                                                                                                                                                            |
| 61 | Morepen Laboratories Ltd         |                              | 486,28 | 73,33  | 2015-16 | Company Annual report 2016                                                                                                                                                                                                                                                            |
| 62 |                                  | Bharat Biotech International | 450,00 | 67,86  | 2015-16 | Biospectrum survey<br><a href="http://www.biospectrumindia.com/category/top20/top-biotech-companies">http://www.biospectrumindia.com/category/top20/top-biotech-companies</a>                                                                                                         |
| 63 | Wanbury                          |                              | 424,67 | 64,04  | 2015-16 | Company Annual report 2016                                                                                                                                                                                                                                                            |
| 64 | Venus Remedies                   |                              | 420,27 | 63,38  | 2015-16 | Company Annual report 2016                                                                                                                                                                                                                                                            |
| 65 | Lincoln Pharmaceuticals          |                              | 407,50 | 61,45  | 2015-16 | Company Annual report 2016                                                                                                                                                                                                                                                            |
| 66 | Marksans Pharma                  |                              | 366,82 | 55,32  | 2015-16 | Company Annual report 2016                                                                                                                                                                                                                                                            |
| 67 |                                  | Anthem Biosciences           | 350,00 | 52,78  | 2015-16 | Biospectrum survey<br><a href="http://www.biospectrumindia.com/category/top20/top-biotech-companies">http://www.biospectrumindia.com/category/top20/top-biotech-companies</a>                                                                                                         |
| 68 |                                  | Sai Life Sciences            | 340,47 | 51,34  | 2014-15 | <a href="http://www.careratings.com/upload/CompanyFiles/PR/SAI%20LIFE%20SCIENCES%20LIMITED-02-18-2016.pdf">http://www.careratings.com/upload/CompanyFiles/PR/SAI%20LIFE%20SCIENCES%20LIMITED-02-18-2016.pdf</a>                                                                       |
| 69 | Anuh Pharma                      |                              | 329,73 | 49,72  | 2015-16 | Company Annual report 2016                                                                                                                                                                                                                                                            |
| 70 | Albert David Ltd                 |                              | 322,19 | 48,59  | 2015-16 | Moneycontrol - Annual report 2016 not available                                                                                                                                                                                                                                       |
| 71 | Ind-Swift Ltd                    |                              | 316,84 | 47,78  | 2015-16 | Company Annual report 2016                                                                                                                                                                                                                                                            |
| 72 | Mangalam Drugs & Organics Ltd    |                              | 295,18 | 44,51  | 2015-16 | Company Annual report 2016                                                                                                                                                                                                                                                            |
| 73 | Advanced Enzyme Technologies Ltd |                              | 293,80 | 44,31  | 2015-16 | Company Annual report 2016                                                                                                                                                                                                                                                            |
| 74 | RPG Life Sciences Ltd            |                              | 280,10 | 42,24  | 2015-16 | Company Annual report 2016                                                                                                                                                                                                                                                            |
| 75 |                                  | Concord Biotech              | 272,90 | 41,15  | 2015-16 | Biospectrum survey - accessed Dec 5 2016 -<br><a href="http://www.biospectrumindia.com/category/top20/top-biotech-companies">http://www.biospectrumindia.com/category/top20/top-biotech-companies</a>                                                                                 |
| 76 |                                  | Tablets (India) Ltd          | 271,00 | 40,87  | 2015-16 | <a href="http://www.icra.in/Files/Reports/Rationale/Tablets%20India-r-17102016.pdf">http://www.icra.in/Files/Reports/Rationale/Tablets%20India-r-17102016.pdf</a>                                                                                                                     |
| 77 | Parenteral Drugs India Ltd       |                              | 262,32 | 39,56  | 2015-16 | Company Annual report 2016                                                                                                                                                                                                                                                            |
| 78 | Sharon Bio-Medicine Ltd          |                              | 255,40 | 38,51  | 2015-16 | Company Annual report 2016                                                                                                                                                                                                                                                            |
| 79 |                                  | Blue Cross Laboratories      | 250,00 | 37,70  | 2012-13 | India Leadership Conclave 2013 -<br><a href="http://www.indiaprwire.com/pressrelease/medical/20130607198041.htm">http://www.indiaprwire.com/pressrelease/medical/20130607198041.htm</a>                                                                                               |

|     |                                     |                                 |        |       |         |                                                                                                                                                                                                             |
|-----|-------------------------------------|---------------------------------|--------|-------|---------|-------------------------------------------------------------------------------------------------------------------------------------------------------------------------------------------------------------|
| 80  | Aarey Drugs and Pharmaceuticals     |                                 | 249,16 | 37,57 | 2015-16 | Company Annual report 2016                                                                                                                                                                                  |
| 81  | Astec Lifesciences                  |                                 | 245,80 | 37,07 | 2015-16 | Company Annual report 2016                                                                                                                                                                                  |
| 82  | Themis Medicare                     |                                 | 235,98 | 35,59 | 2015-16 | Company Annual report 2016                                                                                                                                                                                  |
| 83  | Caplin Point Laboratories           |                                 | 234,76 | 35,40 | 2015-16 | Company Annual report 2016                                                                                                                                                                                  |
| 84  | Gufic Biosciences                   |                                 | 202,86 | 30,59 | 2015-16 | Company Annual report 2016                                                                                                                                                                                  |
| 85  | Bal Pharma Ltd                      |                                 | 199,60 | 30,10 | 2015-16 | Company Annual report 2016                                                                                                                                                                                  |
| 86  | Amrutanjan Healthcare               |                                 | 192,42 | 29,02 | 2015-16 | Company Annual report 2016                                                                                                                                                                                  |
| 87  |                                     | Aurigene Discovery Technologies | 187,60 | 28,29 | 2015-16 | Dr Reddys Laboratories annual report 2015-16                                                                                                                                                                |
| 88  | Kopran Ltd                          |                                 | 187,31 | 28,25 | 2015-16 | Moneycontrol - Annual report 2016 not available                                                                                                                                                             |
| 89  | Syncom Formulations India           |                                 | 186,57 | 28,13 | 2015-16 | Company Annual report 2016                                                                                                                                                                                  |
| 90  |                                     | TCG Lifesciences                | 165,30 | 24,93 | 2014-15 | <a href="http://www.careratings.com/upload/CompanyFiles/PR/TCG%20LIFESCIENCES%20LIMITED-04-12-2016.pdf">http://www.careratings.com/upload/CompanyFiles/PR/TCG%20LIFESCIENCES%20LIMITED-04-12-2016.pdf</a>   |
| 91  | Sun Pharma Advanced Research Centre |                                 | 164,22 | 24,76 | 2015-16 | Company Annual report 2016                                                                                                                                                                                  |
| 92  |                                     | Advinus Therapeutics            | 160,30 | 24,17 | 2015-16 | <a href="http://www.careratings.com/upload/CompanyFiles/PR/ADVINUS%20THERAPEUTICS%20LTD.-11-08-2016.pdf">http://www.careratings.com/upload/CompanyFiles/PR/ADVINUS%20THERAPEUTICS%20LTD.-11-08-2016.pdf</a> |
| 93  | Alembic Ltd                         |                                 | 152,40 | 22,98 | 2015-16 | Company Annual report 2016                                                                                                                                                                                  |
| 94  | Jagsonpal Pharmaceuticals           |                                 | 144,19 | 21,74 | 2015-16 | Company Annual report 2016                                                                                                                                                                                  |
| 95  | Bharat Immunologicals & Biologicals |                                 | 128,03 | 19,31 | 2015-16 | Moneycontrol - Annual report 2016 not available                                                                                                                                                             |
| 96  | Sanjivani Parenteral Ltd            |                                 | 115,48 | 17,41 | 2015-16 | Moneycontrol - Annual report 2016 not available                                                                                                                                                             |
| 97  | Denis Chem Lab Ltd                  |                                 | 101,11 | 15,25 | 2015-16 | Company Annual report 2016                                                                                                                                                                                  |
| 98  | Everest Organics Ltd                |                                 | 99,84  | 15,06 | 2015-16 | Company Annual report 2016                                                                                                                                                                                  |
| 99  | Jenburkt Pharma                     |                                 | 96,32  | 14,53 | 2015-16 | Company Annual report 2016                                                                                                                                                                                  |
| 100 | NGL Fine-Chem Ltd                   |                                 | 96,29  | 14,52 | 2015-16 | Company Annual report 2016                                                                                                                                                                                  |

(a) Former top-100 companies that have been acquired:

- Matrix Laboratories - acquired 2006 by Mylan Laboratories (ranked top-10 in 2006)
- Dabur Research Foundation – acquired 2008 by Fresenius Kabi (ranked 37 in 2008)
- Ranbaxy - acquired 2008 by Daiichi-Sankyo, and in 2015 by Sun Pharma (ranked 1 in 2008)

(b) Colour code: green = proprietary drug discovery; blue = discovery collaborations; yellow = no proprietary drug discovery

(b) Exchange rate March 31, 2016 (1 US\$ = 66,1428 INR)

## 2. Table 6: Development compounds at Indian pharmaceutical and biotechnology companies

**Table 6.a.: Proprietary development compounds from Indian companies**

| Entry | Company                 | Compound                          | Therapeutic area                                      | Mode of action                                                                       | Target class                       | Year <sup>(a)</sup> | Status (mid-2016)                                                                                    | Refs.    |
|-------|-------------------------|-----------------------------------|-------------------------------------------------------|--------------------------------------------------------------------------------------|------------------------------------|---------------------|------------------------------------------------------------------------------------------------------|----------|
| 1     | Dr Reddy's Laboratories | DRF-2593 /Balaglitazone, <b>1</b> | Type 2 diabetes                                       | Partial Peroxisome proliferator-activated receptor $\gamma$ (PPAR $\gamma$ ) agonism | Nuclear signalling                 | 1996                | Novo Nordisk (1997-2004); Rheosciences (2005-2010); DRL own development in 2010, Phase 3 – stop 2011 | [55, 56] |
| 2     | Dr Reddy's Laboratories | DRF 2725 /Ragaglitazar, <b>2</b>  | Type 2 diabetes                                       | Dual PPAR $\alpha$ / $\gamma$ agonism                                                | Nuclear signalling                 | 1998                | Novo Nordisk (1998-2002) ; Phase 3 - Stop 2002                                                       | [56, 57] |
| 3     | Dr Reddy's Laboratories | DRF 1042, <b>3</b>                | Oncology, solid tumors                                | Topoisomerase-I inhibition                                                           | DNA structure                      | 1998                | ClinTec (2006) ; Phase 2 - stop 2011                                                                 | [59, 60] |
| 4     | Dr Reddy's Laboratories | DRF 1644                          | Oncology                                              | Topoisomerase-I inhibition                                                           | DNA structure                      | 2000                | Phase 1 – stop 2005                                                                                  | [65]     |
| 5     | Dr Reddy's Laboratories | DRF-NPCC                          | Metabolic disorders                                   | Insulin sensitization                                                                | NA                                 | 2000                | Preclinical – stop 2003                                                                              | [395]    |
| 6     | Dr Reddy's Laboratories | DRF-PPI                           | Gastric ulcer                                         | Proton pump inhibition                                                               | Transporter                        | 2000                | Preclinical - stop 2001                                                                              | [54]     |
| 7     | Dr Reddy's Laboratories | DRF 3188, <b>40</b>               | Oncology                                              | Cell cycle blockade                                                                  | NA                                 | 2001                | Preclinical – stop 2003                                                                              | [396]    |
| 8     | Dr Reddy's Laboratories | DRF 4158/LBL-752                  | Type 2 diabetes, dyslipidemia, hypertension, obesity  | Dual PPAR $\alpha$ / $\gamma$ agonism and HMG-CoA Reductase inhibition               | Nuclear signalling, oxidoreductase | 2000                | Novartis licence 2001 ; Preclinical - stop 2003                                                      | [58]     |
| 9     | Dr Reddy's Laboratories | DRF 4367, <b>41</b>               | Inflammation                                          | COX-2 inhibition                                                                     | Oxidoreductase                     | 2000                | Preclinical - stop 2001                                                                              | [397]    |
| 10    | Dr Reddy's Laboratories | DRF 4832                          | Metabolic disorders with cardiovascular complications | PPAR agonism                                                                         | Nuclear signalling                 | 2001                | Preclinical – stop 2004                                                                              | [398]    |
| 11    | Dr Reddy's Laboratories | DRF 4848, <b>42</b>               | Inflammation, pain                                    | Selective COX-2 inhibition                                                           | Oxidoreductase                     | 2001                | Preclinical – stop 2003                                                                              | [399]    |
| 12    | Dr Reddy's Laboratories | NA                                | Cardiovascular disorders, restenosis                  | NA                                                                                   | NA                                 | 2002                | Preclinical - stop 2003                                                                              | [54]     |

|    |                         |                     |                                                           |                                                     |                       |      |                                                      |       |
|----|-------------------------|---------------------|-----------------------------------------------------------|-----------------------------------------------------|-----------------------|------|------------------------------------------------------|-------|
| 13 | Dr Reddy's Laboratories | DRF 5265            | Oncology                                                  | NA                                                  | NA                    | 2004 | Preclinical - stop 2005                              | [54]  |
| 14 | Dr Reddy's Laboratories | DRF 8417, <b>43</b> | Bacterial infections                                      | Oxazolidinone class protein synthesis inhibition    | Protein synthesis     | 2003 | Preclinical - stop 2003                              | [400] |
| 15 | Dr Reddy's Laboratories | RUS 3108            | Cardiovascular disorders, atherosclerosis                 | Perlecan induction                                  | Multimodal            | 2003 | Perlecan Pharma ; Phase 1 – stop 2008                | [62]  |
| 16 | Dr Reddy's Laboratories | DRF 10945           | Metabolic disorders                                       | Non-fibrate predominantly PPAR $\alpha$ agonism     | Nuclear signalling    | 2003 | Perlecan Pharma 2006-08 ; Phase 2 - stop 2008        | [61]  |
| 17 | Dr Reddy's Laboratories | DRF 11057           | Bacterial infections                                      | Oxazolidinone class protein synthesis inhibition    | Protein synthesis     | 2003 | Preclinical - stop 2004                              | [54]  |
| 18 | Dr Reddy's Laboratories | DRL 11605           | Metabolic disorders, obesity, dyslipidemia                | Pan PPAR $\alpha/\delta/\gamma$ agonism             | Nuclear signalling    | 2004 | Perlecan Pharma ; Phase 1 - stop 2007                | [61]  |
| 19 | Dr Reddy's Laboratories | DRL 12424           | Cardiovascular disorders                                  | NA                                                  | NA                    | 2006 | Preclinical - stop 2008                              | [54]  |
| 20 | Dr Reddy's Laboratories | DRF 13792           | Bacterial infections (gram-positive bacteria)             | NA                                                  | NA                    | 2004 | Preclinical – stop 2006                              | [54]  |
| 21 | Dr Reddy's Laboratories | DRL 16536           | Metabolic disorders                                       | AMPK modulation                                     | Kinase (activation)   | 2006 | Perlecan Pharma ; Preclinical - stop 2008            | [54]  |
| 22 | Dr Reddy's Laboratories | DRL 16048           | Bacterial infections (Gram positive resistant infections) | NA                                                  | NA                    | 2007 | Preclinical - stop 2008                              | [54]  |
| 23 | Dr Reddy's Laboratories | NA                  | Respiratory disorders, COPD                               | PPAR $\gamma$ agonism                               | Nuclear signalling    | 2007 | Collaboration Argenta Discovery; Phase 1 - stop 2008 | [64]  |
| 24 | Dr Reddy's Laboratories | DRL 17822           | Dyslipidemia                                              | Cholesterylester transfer protein (CETP) inhibition | Cholesterol transport | 2008 | Phase 2 – stop 2013                                  | [66]  |
| 25 | Dr Reddy's Laboratories | DRL 19440           | Infections                                                | NA                                                  | NA                    | 2010 | Preclinical – stop 2011                              | [54]  |
| 26 | Dr Reddy's Laboratories | DRL 21994           | Dyslipidemia                                              | NA                                                  | NA                    | 2009 | Phase 1 – stop 2011                                  | [54]  |
| 27 | Dr Reddy's Laboratories | DRL 21995           | Dyslipidemia                                              | Lipid metabolism modulation                         | NA                    | 2009 | Phase 1 – stop 2011                                  | [54]  |



|    |         |                                               |                              |                                                                 |                   |      |                                                           |          |
|----|---------|-----------------------------------------------|------------------------------|-----------------------------------------------------------------|-------------------|------|-----------------------------------------------------------|----------|
| 28 | Ranbaxy | RBx 2258/SPM-969/Parvosin/Pamirosin, <b>4</b> | Benign prostatic hyperplasia | Alpha <sub>1α/δ</sub> -adrenoceptor antagonism                  | GPCR              | 1998 | Licensed to Schwarz Pharma (2002), Phase 2 – stop 2004    | [67, 68] |
| 29 | Ranbaxy | RBx-4638 /Clafrinast                          | Bronchial asthma             | VLA-4 antagonism                                                | Integrin          | 2000 | Phase 1 - stop 2003                                       | [76, 77] |
| 30 | Ranbaxy | RBx 7644 /Ranbezolid, <b>6</b>                | Bacterial infections         | Oxazolidinone class protein synthesis inhibition                | Protein synthesis | 2000 | Phase 1 – stop 2004                                       | [78]     |
| 31 | Ranbaxy | RBx 7796, <b>7</b>                            | Allergic rhinitis, asthma    | 5-LO inhibition                                                 | Oxidoreductase    | 2001 | Phase 2 - stop 2004                                       | [79]     |
| 32 | Ranbaxy | RBx 9001, <b>44</b>                           | Benign prostatic hyperplasia | α <sub>1</sub> adrenoceptor antagonism (Tamsulosine metabolite) | GPCR              | 2003 | Preclinical - stop 2004                                   | [401]    |
| 33 | Ranbaxy | RBx 9841                                      | Urinary incontinence         | Selective muscarinic M <sub>3</sub> receptor antagonism         | GPCR              | 2003 | Phase 1 - stop 2006                                       | [80]     |
| 34 | Ranbaxy | RBx 10558, PPD-10558, <b>5</b>                | Hypercholesterolemia         | HMG-CoA synthase inhibition                                     | Transferase       | 2004 | Licensed to PPD/Furiex Pharma (2007); Phase 2 – stop 2011 | [74, 75] |
| 35 | Ranbaxy | RBx 11082                                     | Asthma, COPD                 | PDE4 inhibition                                                 | Phosphodiesterase | 2004 | Preclinical - stop 2007                                   | [67]     |
| 36 | Ranbaxy | RBx 11528                                     | Benign prostatic hyperplasia | NA                                                              | NA                | 2006 | Preclinical - stop 2007                                   | [67]     |
| 37 | Ranbaxy | RBx 14016                                     | Asthma, COPD                 | PDE4 inhibition                                                 | Phosphodiesterase | 2005 | Preclinical - stop 2006                                   | [67]     |
| 38 | Ranbaxy | RBx 14255, <b>45</b>                          | Infections                   | Macrolide/ketolide class protein synthesis inhibition           | Protein synthesis | 2006 | Preclinical - stop 2008                                   | [402]    |
| 39 | Ranbaxy | RBx 10014374                                  | Type 2 diabetes              | NA                                                              | NA                | 2006 | Preclinical - stop 2007                                   | [67]     |
| 40 | Ranbaxy | RBx 10017609                                  | Respiratory diseases, COPD   | Dual MMP-9 and MMP-12 inhibition                                | Protease          | 2007 | Partnered with GSK, Phase 2 - stop 2013                   | [73]     |
| 41 | Ranbaxy | RBx 10017876                                  | COPD, asthma                 | PDE IVB inhibition                                              | Phosphodiesterase | 2007 | Preclinical - stop 2008                                   | [67]     |
| 42 | Ranbaxy | RBx 10019821                                  | Diabetes                     | DPP IV inhibition                                               | Protease          | 2007 | Preclinical - stop 2008                                   | [67]     |
| 43 | Ranbaxy | RBx 10020025                                  | COPD, asthma                 | Muscarinic M <sub>3</sub> receptor antagonism                   | GPCR              | 2007 | Preclinical - stop 2008                                   | [67]     |

|    |           |                                      |                                            |                                                                                                   |                        |      |                                                                                 |              |
|----|-----------|--------------------------------------|--------------------------------------------|---------------------------------------------------------------------------------------------------|------------------------|------|---------------------------------------------------------------------------------|--------------|
| 44 | Torrent   | TRC-282                              | Angina, ischemic stroke, neurodegeneration | Nitric oxide release                                                                              | Cyclase                | 2005 | Preclinical - stop 2006                                                         | [82, 87]     |
| 45 | Torrent   | TRC-4186, <b>8</b>                   | Diabetes related CV complications          | Cleavage of Advanced Glycation Endproducts (AGE) crosslinks                                       | Chemical bond cleavage | 2002 | Novartis license option 2002-2005; Phase 2 completed 2015 – development ongoing | [16, 83, 84] |
| 46 | Torrent   | TRC-8156                             | Diabetes                                   | DPPIV inhibition                                                                                  | Protease               | 2005 | Preclinical - stop 2006                                                         | [88]         |
| 47 | Torrent   | TRC-120038, <b>11</b>                | Hypertension                               | Dual action Angiotensin AT <sub>1</sub> and Endothelin ET <sub>A</sub> receptor antagonism (DARA) | GPCR                   | 2008 | Joint Venture with AstraZeneca (2005); preclinical - stop 2009                  | [89]         |
| 48 | Torrent   | TRC150094, <b>9</b>                  | Cardiometabolic risks                      | Functional diiodothyronine (T <sub>2</sub> ) mimetism                                             | Nuclear signalling     | 2008 | Phase 2 - ongoing 2016                                                          | [16, 85]     |
| 49 | Torrent   | TRC160334, <b>10</b>                 | Kidney failure, intestinal bowel disease   | HIF hydroxylase inhibition                                                                        | Oxidoreductase         | 2012 | Phase 1 - ongoing in EU, IND application in India 2016                          | [86]         |
| 50 | Wockhardt | WCK 771/ Levonadifloxacin, <b>12</b> | Infections, sepsis                         | Fluoroquinolone class topoisomerase/DNA gyrase inhibition                                         | DNA structure          | 2000 | USFDA fast track approval; Phase 2 ongoing, India 2016                          | [91, 92]     |
| 51 | Wockhardt | WCK 919, <b>14</b>                   | Respiratory tract infections               | Fluoroquinolone class topoisomerase/DNA gyrase inhibition                                         | DNA structure          | 2000 | Preclinical - stop 2002                                                         | [403]        |
| 52 | Wockhardt | WCK 993A                             | Infections, sepsis                         | NA                                                                                                | NA                     | 2000 | Preclinical - stop 2001                                                         | [32, 90]     |
| 53 | Wockhardt | WCK 1152, <b>14a</b>                 | Respiratory tract infections               | Fluoroquinolone class topoisomerase/DNA gyrase inhibition                                         | DNA structure          | 2002 | Phase 1 - stop 2012                                                             | [91]         |
| 54 | Wockhardt | WCK 1153, <b>14b</b>                 | Respiratory tract infections               | Fluoroquinolone class topoisomerase/DNA gyrase inhibition                                         | DNA structure          | 2001 | Preclinical - stop 2002                                                         | [91]         |
| 55 | Wockhardt | WCK 1456                             | Infections                                 | NA                                                                                                | NA                     | 2002 | Preclinical - stop 2003                                                         | [90]         |
| 56 | Wockhardt | WCK 1457                             | Infections                                 | NA                                                                                                | NA                     | 2003 | Preclinical - stop 2004                                                         | [90]         |

|    |           |                                          |                                                                                     |                                                                     |                               |      |                                                         |          |
|----|-----------|------------------------------------------|-------------------------------------------------------------------------------------|---------------------------------------------------------------------|-------------------------------|------|---------------------------------------------------------|----------|
| 57 | Wockhardt | WCK 1584                                 | Respiratory and urinary tract infections                                            | NA                                                                  | NA                            | 2001 | Preclinical - stop 2002                                 | [90]     |
| 58 | Wockhardt | WCK 1734                                 | Skin infections, topical                                                            | Fluoroquinolone class topoisomerase/DNA gyrase inhibition           | DNA structure                 | 2004 | Preclinical - stop 2009                                 | [404]    |
| 59 | Wockhardt | WCK 2349/Alalevonad ifloxacin, <b>13</b> | Respiratory tract infections                                                        | Fluoroquinolone class topoisomerase/DNA gyrase inhibition (prodrug) | DNA structure                 | 2006 | USFDA fast track approval; Phase 2 - ongoing India 2016 | [93]     |
| 60 | Wockhardt | WCK 2370                                 | MRSA resistant infections                                                           | Oxazolidinone class protein synthesis inhibition                    | Protein synthesis             | 2008 | Preclinical - stop 2009                                 | [90]     |
| 61 | Wockhardt | WCK 2664                                 | Gram-positive MRSA resistant infections                                             | Oxazolidinone class protein synthesis inhibition                    | Protein synthesis             | 2008 | Preclinical - stop 2009                                 | [90]     |
| 62 | Wockhardt | WCK 4086                                 | Infections                                                                          | Oxazolidinone class protein synthesis inhibition                    | Protein synthesis             | 2010 | Preclinical - ongoing 2016                              | [90]     |
| 63 | Wockhardt | WCK 4873/Nafitromycine                   | Infections                                                                          | Ketolide class protein synthesis inhibition                         | Protein synthesis             | 2010 | Phase 1 - ongoing US 2016                               | [90, 94] |
| 64 | Wockhardt | WCK 5107 /Zidebactam, <b>15</b>          | Infections                                                                          | Dual penicillin-binding protein-2 (PBP2) & betalactamase inhibitor  | Transpeptidase, betalactamase | 2014 | Phase 1 – ongoing 2016                                  | [96]     |
| 65 | Piramal   | P276/Riviciclib, <b>16</b>               | Oncology - multiple myeloma, head and neck cancer, malignant melanoma               | CDK4 inhibition                                                     | Kinase                        | 2002 | Phase 1 2005, Phase 2 2007 - stop 2013                  | [98]     |
| 66 | Piramal   | P664 (back-up compound)                  | Oncology                                                                            | CDK4 inhibition                                                     | Kinase                        | 2005 | Preclinical 2005 – stop 2006                            | [97]     |
| 67 | Piramal   | P979                                     | Inflammation, RA, psoriasis, ankylosing spondylarthritis                            | Blockade of TNF-alpha release, IL-6 inhibition                      | Cytokine                      | 2004 | Preclinical – stop 2013                                 | [97]     |
| 68 | Piramal   | P1446 /Voruciclib, <b>17</b>             | Oncology - multiple myeloma, head and neck cancer, malignant melanoma (b/u to P276) | CDK4 inhibition                                                     | Kinase                        | 2007 | Phase 1 - stop 2015                                     | [98]     |
| 69 | Piramal   | P1539                                    | Inflammation                                                                        | Dual acting NSAID and NO                                            | Oxidoreductase,               | 2002 | Preclinical – stop 2003                                 | [405]    |

|    |            |                            |                                                       |                                                              |                            |      |                                                             |            |
|----|------------|----------------------------|-------------------------------------------------------|--------------------------------------------------------------|----------------------------|------|-------------------------------------------------------------|------------|
|    |            |                            |                                                       | release (Aspirin-linker-NO)                                  | cyclase                    |      |                                                             |            |
| 70 | Piramal    | P1736, <b>18</b>           | Diabetes                                              | Non-PPAR insulin sensitization                               | Nuclear signalling         | 2002 | Phase 2 – stop 2014                                         | [105]      |
| 71 | Piramal    | P1961                      | Oncology                                              | Dual CDK4/HIF1alpha inhibition                               | Kinase, nuclear signalling | 2007 | Phase 1 initiated - stop 2009                               | [97]       |
| 72 | Piramal    | P2026                      | Inflammation                                          | Dual acting NSAID and NO release (Diclofenac-linker-NO)      | Oxidoreductase, cyclase    | 2002 | Preclinical - stop 2003                                     | [406]      |
| 73 | Piramal    | PM181104                   | Infections                                            | Cyclic peptide class protein synthesis inhibition            | Protein synthesis          | 2008 | Preclinical - stop 2014                                     | [407]      |
| 74 | Piramal    | P2745                      | Hematological malignancies, Gleevec-resistant cancers | Transforming growth factor beta (TGFbeta) pathway inhibition | Kinase                     | 2010 | Phase 1 – Stop 2013                                         | [106]      |
| 75 | Piramal    | P3914                      | Inflammation                                          | Dual action Naproxen-linker-NO donor                         | Oxidoreductase             | 2009 | Phase 1 India – Stop 2013                                   | [107, 108] |
| 76 | Piramal    | PL225B/Target X            | Oncology                                              | IGF-1R inhibition (oral)                                     | Kinase                     | 2011 | MSD collaboration; Phase 1 2014 - stop 2014                 | [99-101]   |
| 77 | Piramal    | Target Y                   | Oncology                                              | IGF-1R inhibition                                            | Kinase                     | 2012 | MSD collaboration; preclinical (India) 2012 - stop 2013     | [97]       |
| 78 | Piramal    | P7170/Panulisib, <b>19</b> | Oncology (solid tumors) and inflammation              | Dual PI3K-mTOR and Alk-1 inhibition                          | Kinase                     | 2011 | Partnered with MSD 2013, got back 2014, Phase 1 - stop 2015 | [109, 110] |
| 79 | Piramal    | P7435                      | Diabetes                                              | Diacylglycerol-acyltransferase-1 (DGAT1) inhibition          | Transferase                | 2011 | Phase 1 US completed 2015 – stop 2015                       | [97]       |
| 80 | Piramal    | P11187                     | Metabolic disorders                                   | GPR40 agonism                                                | GPCR                       | 2012 | Phase 1 completed 2015 – stop 2015                          | [97]       |
| 81 | Sun Pharma | SUN 1334H, <b>20</b>       | Allergies                                             | Histamine H <sub>1</sub> receptor antagonism                 | GPCR                       | 2003 | Phase 2 - stop 2013                                         | [116, 117] |
| 82 | Sun Pharma | SUN 09                     | Spasm related disorders                               | GABA <sub>B</sub> receptor agonism via Baclofen prodrug      | GPCR                       | 2007 | Phase 1 India - stop 2013                                   | [118]      |

|     |              |                                          |                              |                                                   |                    |      |                                                                             |                |
|-----|--------------|------------------------------------------|------------------------------|---------------------------------------------------|--------------------|------|-----------------------------------------------------------------------------|----------------|
| 83  | Sun Pharma   | SUN 44                                   | Neuropathy, seizures         | GABA receptor agonism via Gabapentin prodrug      | Ion channel        | 2007 | IND India - preclinical - stop 2013                                         | [118]          |
| 84  | Sun Pharma   | SUN 461                                  | Asthma, COPD                 | Glucocorticoid receptor agonism                   | Nuclear signalling | 2007 | Preclinical - stop 2010                                                     | [114]          |
| 85  | Sun Pharma   | SUN 597, 21                              | Inflammation, psoriasis      | Glucocorticoid receptor agonism                   | Nuclear signalling | 2010 | Phase 1 EU - stop 2015 for inhalation; Phase 1 ongoing for dermatology 2016 | [120-122, 126] |
| 86  | Sun Pharma   | SUN K706                                 | Chronic myeloid leukemia     | Bcr-abl Tyrosine kinase inhibition                | Kinase             | 2011 | Phase 1 - ongoing 2016                                                      | [114, 124-126] |
| 87  | Sun Pharma   | SUN L731                                 | Asthma, allergic rhinitis    | LTD4 receptor antagonism                          | GPCR               | 2013 | Preclinical - stop 2015                                                     | [123, 126]     |
| 88  | Sun Pharma   | SUN K954                                 | Chronic myeloid leukemia     | Bcr-abl Tyrosine kinase inhibition                | Kinase             | 2016 | Preclinical – ongoing 2016                                                  | [124-126]      |
| 89  | Zydus Cadila | ZYH1/<br>Saroglitazar<br>(Lipaglyn™), 22 | Dyslipidemia                 | PPAR $\alpha/\gamma$ agonism                      | Nuclear signalling | 2004 | Launched 2013, clinical development for further indications ongoing (2016)  | [132]          |
| 90  | Zydus Cadila | ZYH2                                     | Type 2 diabetes              | PPAR $\alpha/\gamma$ agonism                      | Nuclear signalling | 2005 | Phase 1 - stop 2012                                                         | [131]          |
| 91  | Zydus Cadila | ZYO1                                     | Obesity, diabetes            | CB <sub>1</sub> receptor antagonism               | GPCR               | 2005 | Phase 1 - stop 2012                                                         | [136]          |
| 92  | Zydus Cadila | ZYI1                                     | Inflammatory disorders, pain | NA                                                | NA                 | 2005 | Phase 2 - stop 2012                                                         | [142]          |
| 93  | Zydus Cadila | ZYH7                                     | Dyslipidemia                 | PPAR $\alpha$ agonism                             | Nuclear signalling | 2007 | Phase 2 completed 2015 – development ongoing                                | [131]          |
| 94  | Zydus Cadila | ZYT1                                     | Dyslipidemia                 | Thyroid hormone receptor beta (TR-beta) agonism   | Nuclear signalling | 2008 | Phase 1 - stop 2012                                                         | [141]          |
| 95  | Zydus Cadila | ZYD1                                     | Diabetes, obesity            | GLP-1 receptor agonism                            | GPCR               | 2009 | Phase 1 - stop 2014                                                         | [137]          |
| 96  | Zydus Cadila | ZYOG1                                    | Diabetes, obesity            | GLP-1 receptor agonism                            | GPCR               | 2009 | Phase 1 - stop 2014                                                         | [138]          |
| 97  | Zydus Cadila | ZYGK1                                    | Diabetes                     | Glucokinase activation                            | Kinase             | 2011 | Phase 1 - stop 2014                                                         | [139]          |
| 98  | Zydus Cadila | ZYPH0907                                 | Osteoporosis                 | Parathyroid hormone (PTH) receptor agonism (oral) | GPCR               | 2011 | Phase 1 - stop 2014                                                         | [143]          |
| 99  | Zydus Cadila | ZYG19                                    | Diabetes                     | GPR-119 agonism                                   | GPCR               | 2011 | Phase 1 - stop 2015                                                         | [140]          |
| 100 | Zydus Cadila | ZYGL241                                  | Diabetes, obesity            | GLP-1 agonism (oral)                              | GPCR               | 2011 | Preclinical - stop 2012                                                     | [131]          |
| 101 | Zydus Cadila | ZYDPLA1                                  | Diabetes                     | DPPIV inhibition                                  | Protease           | 2013 | Phase 1 trials US completed – development ongoing                           | [133]          |

|     |                                  |                                  |                                                            |                                                                 |                   |      |                                                                 |            |
|-----|----------------------------------|----------------------------------|------------------------------------------------------------|-----------------------------------------------------------------|-------------------|------|-----------------------------------------------------------------|------------|
|     |                                  |                                  |                                                            |                                                                 |                   |      | 2016                                                            |            |
| 102 | Zydus Cadila                     | ZYAN1                            | Anemia (commonly observed in chronic kidney disorder)      | Hypoxia-inducible factor prolyl hydroxylase (HIF-PH) inhibition | Oxidoreductase    | 2014 | Phase 1 trials Australia completed – development ongoing 2016   | [134]      |
| 103 | Zydus Cadila                     | ZYTP1                            | Oncology                                                   | PARP inhibition (oral)                                          | DNA structure     | 2014 | Preclinical - ongoing 2016 (IND approved for Phase 1 in India)  | [135]      |
| 104 | FDC Limited                      | NCL-FDC-101                      | Fungal infections                                          | Not available                                                   | Not available     | 2006 | No information available on development status                  | [149]      |
| 105 | JB Chemicals and Pharmaceuticals | JB-7/G                           | Inflammation, pain                                         | COX-2 inhibition                                                | Oxidoreductase    | 2004 | Preclinical 2004 – abandoned 2005                               | [156]      |
| 106 | Glenmark                         | GRC 1087                         | Obesity, diabetes                                          | $\beta_3$ adrenergic receptor agonism                           | GPCR              | 2002 | Preclinical - stop 2004                                         | [408]      |
| 107 | Glenmark                         | GRC 3015                         | Asthma, COPD                                               | PDE4 inhibition                                                 | Phosphodiesterase | 2002 | Preclinical - stop 2004                                         | [161, 162] |
| 108 | Glenmark                         | GRC 3566                         | Asthma, COPD                                               | PDE4 inhibition                                                 | Phosphodiesterase | 2003 | Preclinical - stop 2005                                         | [161, 162] |
| 109 | Glenmark                         | GRC 3590                         | Asthma, COPD                                               | PDE4 inhibition                                                 | Phosphodiesterase | 2003 | Preclinical - stop 2004                                         | [161, 162] |
| 110 | Glenmark                         | GRC 3785                         | Asthma, COPD                                               | PDE4 inhibition                                                 | Phosphodiesterase | 2003 | Preclinical - stop 2004                                         | [161, 162] |
| 111 | Glenmark                         | GRC 3886 /Oglemilast, <b>23</b>  | Asthma, COPD                                               | PDE4 inhibition                                                 | Phosphodiesterase | 2004 | Licensed to Forest (2004)/ Teijin (2005) - Phase 2 stop 2009    | [163, 164] |
| 112 | Glenmark                         | GRC 4039 /Revamilast, <b>26</b>  | Asthma, rheumatoid arthritis, other inflammatory disorders | PDE4 inhibition                                                 | Phosphodiesterase | 2006 | Phase 2 - stop 2012                                             | [175, 176] |
| 113 | Glenmark                         | GRC 6211, <b>25</b>              | Pain, migraine, incontinence, asthma                       | TRPV1 antagonism                                                | Ion channel       | 2006 | Licensed to Lilly (2007), Phase 2 - stop 2008                   | [167, 168] |
| 114 | Glenmark                         | GRC 8087                         | Diabetes                                                   | DPPIV inhibition                                                | Protease          | 2004 | Preclinical - stop 2004                                         | [161]      |
| 115 | Glenmark                         | GRC 8200 /Melogliptin, <b>24</b> | Diabetes                                                   | DPPIV inhibition                                                | Protease          | 2004 | Licensed to Merck KgaA, 2006, returned 2008 - Phase 2 stop 2011 | [165, 166] |

|     |               |                                |                                                                     |                                         |                    |      |                                                                                 |            |
|-----|---------------|--------------------------------|---------------------------------------------------------------------|-----------------------------------------|--------------------|------|---------------------------------------------------------------------------------|------------|
| 116 | Glenmark      | GRC 9332                       | Metabolic disorders                                                 | SCD1 inhibition                         | Oxidoreductase     | 2008 | Preclinical - stop 2008                                                         | [409]      |
| 117 | Glenmark      | GRC 10389                      | Obesity                                                             | CB <sub>1</sub> receptor antagonism     | GPCR               | 2006 | Preclinical - stop 2007                                                         | [161, 410] |
| 118 | Glenmark      | GRC 10622                      | Pain                                                                | CB <sub>2</sub> receptor agonism        | GPCR               | 2006 | Preclinical - stop 2007                                                         | [161]      |
| 119 | Glenmark      | GRC 10693/Tedalinab, <b>27</b> | Neuropathic pain, osteoarthritis, inflammatory pain                 | CB <sub>2</sub> receptor agonism        | GPCR               | 2006 | Phase 1 - stop 2011                                                             | [177, 178] |
| 120 | Glenmark      | GRC 10801                      | Obesity                                                             | CB <sub>1</sub> receptor antagonism     | GPCR               | 2006 | Preclinical - stop 2008                                                         | [161]      |
| 121 | Glenmark      | GRC 15300 = SAR292833          | Osteoarthritic pain                                                 | TRPV3 antagonism                        | Ion channel        | 2008 | Licensed to Sanofi (2010) - Phase 2 PoC study failed - returned 2013, stop 2014 | [169, 170] |
| 122 | Glenmark      | GRC 17173                      | Osteoarthritis, neuropathic and dental pain                         | TRPV3 antagonism                        | Ion channel        | 2008 | Preclinical - stop 2008                                                         | [161]      |
| 123 | Glenmark      | GRC 17536                      | Respiratory disorders, pain                                         | TRPA1 inhibition                        | Ion channel        | 2010 | Phase 2 - ongoing 2016                                                          | [179]      |
| 124 | Glenmark      | GRC 27864                      | Inflammation, pain                                                  | mPGES-1 inhibition                      | Synthase           | 2012 | Option agreement with Forest Labs (2012), Phase 1 - ongoing 2016                | [171-174]  |
| 125 | Lupin         | LL 3858 /Sudoterb, <b>28</b>   | Tuberculosis                                                        | Undefined mechanism                     | NA                 | 2004 | Phase 2 India completed 2013 - stop 2015                                        | [183, 184] |
| 126 | Lupin         | LL 4218 /Desoside-P            | Psoriasis                                                           | Undefined mechanism                     | NA                 | 2004 | Phase 2 India - stop 2010                                                       | [182]      |
| 127 | Lupin         | LL 6531                        | Metabolic diseases                                                  | PPAR modulation                         | Nuclear signalling | 2008 | Preclinical - stop 2009                                                         | [181]      |
| 128 | Lupin         | LND 101001                     | CNS, cognitive defects, AD                                          | α <sub>7</sub> nACh receptor modulators | Ion channel        | 2011 | Phase 2 in Europe - ongoing 2016                                                | [185, 186] |
| 129 | Lupin         | LNP 1892                       | Primary hyperparathyroidism (PHPT) and Chronic Kidney Disease (CKD) | CaSR receptor modulation                | GPCR               | 2013 | Phase 1 successfully completed - development ongoing 2016                       | [187]      |
| 130 | Lupin         | LNP 3794                       | Oncology                                                            | MEK inhibition                          | Kinase             | 2013 | Phase 1 EU - ongoing 2016                                                       | [188]      |
| 131 | Lupin         | LNP 1955                       | Autoimmune diseases, (rheumatoid arthritis, psoriasis)              | CRAC modulation                         | Ion channel        | 2014 | Phase 2 PoC study - ongoing 2016                                                | [189]      |
| 132 | Reliance Life | RSCL-0409                      | Inflammatory                                                        | TLR signalling pathways                 | NA                 | 2007 | Preclinical – stop 2010                                                         | [194]      |

|     |                        |                            |                                         |                                            |                              |      |                                                                          |            |
|-----|------------------------|----------------------------|-----------------------------------------|--------------------------------------------|------------------------------|------|--------------------------------------------------------------------------|------------|
|     | Sciences               |                            | disorders                               | inhibition                                 |                              |      |                                                                          |            |
| 133 | Reliance Life Sciences | RSCL-0520                  | Inflammatory disorders                  | TLR signalling pathways inhibition         | NA                           | 2007 | Preclinical – stop 2010                                                  | [195]      |
| 134 | Orchid                 | OCID 2987                  | Inflammation, COPD, asthma              | PDE4 inhibition                            | Phosphodiesterase            | 2010 | Phase 1 successfully completed 2013 in EU, – stop 2015                   | [197, 201] |
| 135 | Orchid                 | OCID 5005                  | Oncology                                | STAT-3/IL 6 inhibition                     | Nuclear signalling, cytokine | 2006 | Preclinical - stop 2006                                                  | [197]      |
| 136 | Orchid                 | NA                         | Inflammation                            | Th1/Th2 cytokine synthase inhibition       | Cytokine                     | 2007 | Preclinical - stop 2012                                                  | [197]      |
| 137 | Orchid                 | OCID 4681, <b>29</b>       | Oncology                                | HDAC inhibition                            | Deacetylase                  | 2010 | Phase 1 trial India solid tumors 2012 – stop 2014                        | [202, 203] |
| 138 | Orchid                 | OCID5090/AAI101, <b>30</b> | Infections                              | Betalactamase inhibition                   | Betalactamase                | 2012 | Licensed to Allecra Therapeutics (2013) - Phase 1, France - ongoing 2016 | [204-206]  |
| 139 | Suven                  | SUVN-501                   | CNS diseases, mild cognitive impairment | 5-HT <sub>6</sub> receptor antagonism      | GPCR                         | 2009 | Preclinical - ongoing 2016                                               | [212, 411] |
| 140 | Suven                  | SUVN-502                   | CNS diseases, mild cognitive impairment | 5-HT <sub>6</sub> receptor antagonism      | GPCR                         | 2007 | Phase 2a for PoC study – ongoing 2016                                    | [212-214]  |
| 141 | Suven                  | SUVN-504, <b>46</b>        | CNS, Obesity, metabolic disorders       | 5-HT <sub>6</sub> receptor antagonism      | GPCR                         | 2008 | Preclinical - stop 2010 for CNS, stop 2014 metabolic disorders           | [412, 413] |
| 142 | Suven                  | SUVN-507, <b>47</b>        | CNS diseases, mild cognitive impairment | 5-HT <sub>6</sub> receptor antagonism      | GPCR                         | 2009 | Preclinical - ongoing 2016                                               | [212, 414] |
| 143 | Suven                  | SUVN-512                   | CNS diseases, mild cognitive impairment | 5-HT <sub>6</sub> receptor antagonism      | GPCR                         | 2013 | Preclinical - ongoing 2016                                               | [212, 415] |
| 144 | Suven                  | SUVN-901                   | CNS diseases, mild cognitive impairment | 5-HT <sub>6</sub> receptor antagonism      | GPCR                         | 2009 | Preclinical - stop 2012                                                  | [414]      |
| 145 | Suven                  | SUVN-911                   | Major depressive disorder (MDD)         | α4 β2 nACh receptor antagonism             | Ion channel                  | 2010 | Preclinical - ongoing 2016                                               | [212, 217] |
| 146 | Suven                  | SUVN-976                   | CNS diseases, mild cognitive impairment | 5-HT <sub>6</sub> receptor antagonism      | GPCR                         | 2010 | Preclinical - stop 2015                                                  | [210]      |
| 147 | Suven                  | SUVN-D4010                 | CNS diseases, mild                      | Partial 5-HT <sub>4</sub> receptor agonism | GPCR                         | 2010 | Phase 1 US - ongoing 2016                                                | [212, 216] |



|     |                                 |                       |                                                       |                                                                          |                   |      |                                                               |            |
|-----|---------------------------------|-----------------------|-------------------------------------------------------|--------------------------------------------------------------------------|-------------------|------|---------------------------------------------------------------|------------|
|     |                                 |                       | cognitive impairment                                  |                                                                          |                   |      |                                                               |            |
| 148 | Suven                           | NA                    | CNS diseases                                          | $\alpha_7$ nACh receptor agonism or partial antagonism                   | Ion channel       | 2009 | Preclinical - stop 2010 for CNS                               | [210]      |
| 149 | Suven                           | SUVN-G3031            | CNS diseases, mild cognitive impairment               | Histamine H <sub>3</sub> receptor antagonism                             | GPCR              | 2012 | Phase 1 US completed 2015 – development ongoing               | [212, 215] |
| 150 | Suven                           | NA                    | Pain                                                  | CB <sub>2</sub> receptor agonism                                         | GPCR              | 2013 | Preclinical - ongoing 2016                                    | [212]      |
| 151 | Suven                           | NA                    | Pain                                                  | $\alpha_4 \beta_2$ nACh receptor antagonism                              | Ion channel       | 2016 | Preclinical – ongoing 2016                                    | [212]      |
| 152 | Suven                           | NA                    | CNS diseases, mild cognitive impairment               | Positive allosteric modulation of muscarinic M <sub>1</sub> Ach receptor | GPCR              | 2016 | Preclinical – ongoing 2016                                    | [212]      |
| 153 | Suven                           | NA                    | Psychiatric disorders                                 | Multimodal                                                               | NA                | 2016 | Preclinical – ongoing 2016                                    | [212]      |
| 154 | Natco                           | NRC/AN/015            | Oncology                                              | Bcr-abl Tyrosine kinase inhibition                                       | Kinase            | 2006 | Preclinical - stop 2007                                       | [218]      |
| 155 | Natco                           | NRC-AN-019, <b>31</b> | Oncology, imatinib resistant chronic myeloid leukemia | Bcr-abl Tyrosine kinase inhibition                                       | Kinase            | 2006 | Phase 2 India solid tumors - ongoing 2016                     | [219]      |
| 156 | Natco                           | NRC 2694, <b>32</b>   | Oncology, solid tumors                                | EGFR kinase inhibition                                                   | Kinase            | 2009 | Phase 1 India - ongoing 2016                                  | [220]      |
| 157 | Panacea                         | PBL 1427              | Diabetes, metabolic diseases                          | DPPIV inhibition                                                         | Protease          | 2010 | Phase 1 India - ongoing 2016, looking to partner              | [222, 223] |
| 158 | Panacea                         | PBL 1920              | CNS disorders, depression                             | Unknown mechanism                                                        | NA                | 2013 | Preclinical - on hold 2014, looking to partner <sup>(b)</sup> | [221]      |
| 159 | Panacea                         | PBL 2270              | Gram positive bacterial infections                    | Oxazolidinone class protein synthesis inhibition                         | Protein synthesis | 2010 | Preclinical - on hold 2014, looking to partner <sup>(b)</sup> | [221]      |
| 160 | Panacea                         | PBL 2958              | Diabetes, metabolic syndrome and related diseases     | SGLT2 inhibition                                                         | Transporter       | 2013 | Preclinical - on hold 2014, looking to partner <sup>(b)</sup> | [221]      |
| 161 | Matrix Laboratories (now Mylan) | MX 4007               | Diabetes                                              | DPPIV inhibition                                                         | Protease          | NA   | No information available on development status                | [228]      |
| 162 | Matrix Laboratories (now Mylan) | MX 6001               | Inflammation, allergic diseases                       | PDE4 inhibition                                                          | Phosphodiesterase | NA   | No information available on development status                | [228]      |

|     |              |                     |                                                         |                                               |                          |      |                                                                          |            |
|-----|--------------|---------------------|---------------------------------------------------------|-----------------------------------------------|--------------------------|------|--------------------------------------------------------------------------|------------|
| 163 | Hetero Drugs | NA                  | HIV                                                     | Not disclosed                                 | NA                       | 2012 | No information available on development status                           | [233]      |
| 164 | Hetero Drugs | NA                  | HIV                                                     | Not disclosed                                 | NA                       | 2012 | No information available on development status                           | [233]      |
| 165 | Jubilant     | JIEM-0186           | Oncology                                                | EGFR kinase inhibition                        | Kinase                   | 2015 | Preclinical – ongoing 2016                                               | [237]      |
| 166 | Jubilant     | JBI-097             | Oncology                                                | Dual LSD1/HDAC inhibition                     | Demethylase, deacetylase | 2015 | Preclinical – ongoing 2016                                               | [238, 239] |
| 167 | Jubilant     | CK-103/JBET-050)    | Oncology                                                | BET BRD4 bromodomain inhibition               | Bromodomain              | 2015 | Licensed to Checkpoint Therapeutics (2016)<br>preclinical – ongoing 2016 | [240, 241] |
| 168 | Alkem        | Alkem-43            | Osteoporosis                                            | Cathepsin K inhibition                        | Protease                 | 2014 | Early preclinical stage - drug discovery terminated end 2015             | [252]      |
| 169 | Advinus      | GKM-001 /ADV1002401 | Type 2 diabetes                                         | Glucokinase activation                        | Kinase (activation)      | 2008 | Phase 2 - ongoing 2016                                                   | [275, 276] |
| 170 | Advinus      | GKM-002             | Type 2 diabetes                                         | Glucokinase activation                        | Kinase (activation)      | 2012 | Backup to GKM-001 - preclinical ongoing 2016                             | [278, 279] |
| 171 | Advinus      | PNQ-103             | Immuno-oncology, previously COPD & Sickle Cell Disease  | Adenosine A <sub>2B</sub> receptor antagonism | GPCR                     | 2011 | Preclinical - ongoing 2016                                               | [278, 279] |
| 172 | Advinus      | PNQ-201             | Immuno-oncology, previously IBD                         | Adenosine A <sub>2B</sub> receptor antagonism | GPCR                     | 2011 | Preclinical ongoing - 2016                                               | [278, 279] |
| 173 | Advinus      | PNQ-370             | Immuno-oncology, previously Oncology (solid tumors, PD) | Adenosine A <sub>2B</sub> receptor antagonism | GPCR                     | 2014 | Preclinical - ongoing 2016                                               | [278, 279] |
| 174 | Advinus      | PNQ-401             | Immuno-oncology, previously Autoimmune diseases         | Dual JAK3/1 inhibition                        | Kinase                   | 2013 | Early preclinical - ongoing 2016                                         | [278, 279] |
| 175 | Advinus      | PNQ-701             | Immuno-oncology, previously Autoimmune diseases         | JAK1 selective inhibition                     | Kinase                   | 2015 | Early preclinical - ongoing 2016                                         | [278, 279] |
| 176 | Advinus      | PNQ-849             | Immuno-oncology, previously Autoimmune diseases         | BTK inhibition                                | Kinase                   | 2015 | Preclinical – ongoing 2016                                               | [278, 279] |

|     |                         |                     |                                                            |                                                        |                     |      |                                                                |            |
|-----|-------------------------|---------------------|------------------------------------------------------------|--------------------------------------------------------|---------------------|------|----------------------------------------------------------------|------------|
| 177 | Advinus                 | PNQ-154             | Immuno-oncology                                            | BTK inhibition                                         | Kinase              | 2015 | Preclinical – ongoing 2016                                     | [278, 279] |
| 178 | Anthem Biosciences      | PAT-1118            | Oncology                                                   | HDAC inhibition                                        | Deacetylase         | 2014 | Preclinical – ongoing 2016                                     | [291, 292] |
| 179 | Anthem Biosciences      | PAT-1102, <b>33</b> | Oncology                                                   | HDAC inhibition                                        | Deacetylase         | 2014 | Preclinical – ongoing 2016                                     | [291, 292] |
| 180 | Aurigene                | Debio 1142          | Oncology                                                   | Kinase inhibition (undisclosed pathway)                | Kinase              | 2011 | Licensed to Debiopharm - preclinical stop 2014                 | [295]      |
| 181 | Aurigene                | AUNP-012/W014A      | Oncology                                                   | PD-1 inhibition (peptide)                              | Immune check-point  | 2012 | Licensed to Pierre Fabre 2014 - preclinical stop 2015          | [296, 297] |
| 182 | Aurigene                | ODM-207             | Oncology                                                   | BET bromodomain inhibition                             | Bromodomain         | 2014 | Option agreement with Orion Pharma, preclinical - ongoing 2016 | [301-303]  |
| 183 | Aurigene                | AU-4869             | Oncology                                                   | NAMPT inhibition                                       | Transferase         | 2014 | Preclinical - ongoing 2016                                     | [304]      |
| 184 | Aurigene                | CA-170/AUPM-170     | Oncology                                                   | Dual PD-L1/Vista inhibition (small molecules)          | Immune check-points | 2015 | Licensed to Curis – Phase 1 ongoing 2016                       | [298, 299] |
| 185 | Aurigene                | CA-327/AUMP-327     | Oncology                                                   | Dual PD-L1/Tim-3                                       | Immune check-points | 2015 | Licensed to Curis – preclinical ongoing 2016                   | [298, 299] |
| 186 | Aurigene                | CA-4948/AU-4948     | Oncology                                                   | IRAK-4 inhibition                                      | Kinase              | 2015 | Licensed to Curis - preclinical ongoing 2016                   | [298, 299] |
| 187 | Aurigene                | NA                  | Oncology                                                   | Covalent KRAS inhibition                               | Hydrolase (GTPase)  | 2015 | Preclinical – ongoing 2016                                     | [305]      |
| 188 | Aurigene                | NA                  | Oncology                                                   | Covalent cdk7 inhibition                               | Kinase              | 2015 | Preclinical – ongoing 2016                                     | [306]      |
| 189 | Aurigene                | NA                  | Inflammation                                               | ROR $\gamma$ antagonism or inverse agonism             | Nuclear signalling  | 2014 | Preclinical - ongoing 2016                                     | [307]      |
| 190 | Aurigene                | AEA16, <b>34</b>    | Bacterial infections - MRSA                                | Enoyl-acyl carrier protein reductase (FabI) inhibition | Oxidoreductase      | 2013 | Preclinical - stop 2015                                        | [308]      |
| 191 | Aurigene                | NA                  | Bacterial infections                                       | PD-1 inhibition                                        | Immune check-point  | 2013 | Preclinical - ongoing 2016                                     | [293]      |
| 192 | GVK Bio                 | GVK-Trkl            | Oncology                                                   | TrkA inhibition                                        | Kinase              | 2016 | Preclinical – ongoing 2016                                     | [310, 311] |
| 193 | Kareus Therapeutics     | KU-046              | Alzheimer's disease, multiple sclerosis, Fragile X Syndrom | Agents against oxidative stress, energy deficiency     | NA                  | 2013 | Phase 1 completed 2014 (US) – development ongoing US           | [314]      |
| 194 | Kareus Therapeutics     | KU-5039             | Diabetes                                                   | AMPK activation                                        | Kinase (activation) | 2013 | Phase 1 - ongoing US 2016                                      | [315]      |
| 195 | Connexios Life Sciences | CNX-010-49          | Metabolic disorders, type 2 diabetes                       | 11 $\beta$ HSD 1 inhibition                            | Oxidoreductase      | 2011 | Preclinical - ongoing 2016                                     | [321]      |

|     |                             |                               |                                                         |                                                 |                     |      |                                                                     |            |
|-----|-----------------------------|-------------------------------|---------------------------------------------------------|-------------------------------------------------|---------------------|------|---------------------------------------------------------------------|------------|
| 196 | Connexios Life Sciences     | CNX-011-67                    | Metabolic disorders, type 2 diabetes                    | GPR 40 agonism                                  | GPCR                | 2011 | Preclinical - ongoing 2016                                          | [319]      |
| 197 | Connexios Life Sciences     | CNX-012-570                   | Metabolic disorders, type 2 diabetes                    | AMPK activation                                 | Kinase (activation) | 2013 | Licensed to Boehringer Ingelheim (2014), preclinical - ongoing 2016 | [317, 318] |
| 198 | Connexios Life Sciences     | CNX-013-B2                    | Metabolic disorders, type 2 diabetes                    | RXR $\alpha$ / $\beta$ / $\gamma$ activation    | Nuclear signalling  | 2014 | Preclinical - ongoing 2016                                          | [320]      |
| 199 | Rhizen Pharmaceuticals      | RP1400                        | Oncology, solid tumors                                  | c-Met kinase inhibition                         | Kinase              | 2014 | Preclinical - stop 2015                                             | [330]      |
| 200 | Rhizen Pharmaceuticals      | RP-3128                       | Inflammation, RA, asthma, allergy                       | CRAC channel inhibition                         | Ion channel         | 2014 | Preclinical - ongoing 2016                                          | [331]      |
| 201 | Rhizen Pharmaceuticals      | TGR-1202/RP5264, <b>35</b>    | Oncology, B-cell lymphomas                              | Selective PI3K $\delta$ kinase inhibition       | Kinase              | 2011 | Licensed to TG Therapeutics 2014, Phase 2/3 - ongoing 2016          | [324-326]  |
| 202 | Rhizen Pharmaceuticals      | RP-6503                       | Asthma, COPD, pulmonary fibrosis                        | Dual PI3K $\gamma$ / $\delta$ kinase inhibition | Kinase              | 2013 | Licensed to Novartis (2015), preclinical – ongoing 2016             | [332]      |
| 203 | Rhizen Pharmaceuticals      | RP-6530, Tenalisib, <b>36</b> | Oncology, hematological malignancies                    | Dual PI3K $\gamma$ / $\delta$ kinase inhibition | Kinase              | 2012 | Phase 1 - ongoing 2016                                              | [324, 327] |
| 204 | Rhizen Pharmaceuticals      | RP10107                       | Oncology - hematological malignancies, and solid tumors | Glutaminase inhibition                          | Hydrolase           | 2016 | Preclinical – ongoing 2016                                          | [329]      |
| 205 | Sphaera Pharma              | SPR965                        | Oncology                                                | Pan PI3K/mTOR inhibition                        | Kinase              | 2014 | Preclinical - ongoing 2016                                          | [335]      |
| 206 | Sphaera Pharma              | SPR113                        | Infectious diseases – multidrug resistant tuberculosis  | GPR109A (NIACR1) inhibition                     | GPCR                | 2015 | ICGEB collaboration, preclinical - ongoing 2016                     | [338-340]  |
| 207 | Curadev                     | RG70099/CRD1152               | Oncology                                                | Dual IDO/TDO inhibition                         | Oxidoreductase      | 2014 | Licensed to Hoffmann La Roche (2015), preclinical - ongoing 2016    | [342-345]  |
| 208 | Shantani Proteome Analytics | H1T1007, <b>37</b>            | Type 2 diabetes                                         | Not disclosed novel mode of action              | NA                  | 2015 | Preclinical - ongoing 2016                                          | [349, 350] |
| 209 | Vyome Biosciences           | VB-1953                       | Bacterial infections                                    | Not disclosed dual mode of action               | NA                  | 2015 | Preclinical - ongoing 2016 (approved for Phase 1 US                 | [352, 354] |

|                                                                                                                    |                   |                        |                                      |                                                        |                    |      | FDA)                       |            |
|--------------------------------------------------------------------------------------------------------------------|-------------------|------------------------|--------------------------------------|--------------------------------------------------------|--------------------|------|----------------------------|------------|
| 210                                                                                                                | Vyome Biosciences | NA                     | Bacterial infections                 | Not disclosed dual mode of action                      | NA                 | 2015 | Preclinical – ongoing 2016 | [355]      |
| 211                                                                                                                | Vitas Pharma      | VT-02-00068, <b>38</b> | Gram positive infections             | Enoyl-acyl carrier protein reductase (FabI) inhibition | Oxidoreductase     | 2014 | Preclinical - ongoing 2016 | [358, 359] |
| 212                                                                                                                | Invictus Oncology | IO-125, <b>39</b>      | Oncology                             | Cisplatinium-cholesterol conjugation                   | DNA structure      | 2015 | Preclinical – ongoing 2016 | [362, 363] |
| 213                                                                                                                | Krish Biotech     | KBR1001/<br>KBRPL1001  | Autoimmune and inflammatory diseases | RORγt antagonism                                       | Nuclear signalling | 2015 | Preclinical – ongoing 2016 | [365]      |
| 214                                                                                                                | Krish Biotech     | KBR2001/<br>KBR2001    | Diabetes and metabolic disorders     | GPR120 agonism                                         | GPCR               | 2015 | Preclinical – ongoing 2016 | [366]      |
| Notes :                                                                                                            |                   |                        |                                      |                                                        |                    |      |                            |            |
| (a): Year preclinical development initiated                                                                        |                   |                        |                                      |                                                        |                    |      |                            |            |
| (b): Development status not disclosed – one single compound currently in preclinical development at Panacea Biotec |                   |                        |                                      |                                                        |                    |      |                            |            |

**Table 6.b.: Development compounds in-licensed by Indian companies**

| Entry                                                                                                                            | Company                | Compound                       | Therapeutic area                                   | Mode of action                                            | Target class        | Year                | Status (mid-2016)                                                   | Refs.      |
|----------------------------------------------------------------------------------------------------------------------------------|------------------------|--------------------------------|----------------------------------------------------|-----------------------------------------------------------|---------------------|---------------------|---------------------------------------------------------------------|------------|
| 1                                                                                                                                | Ranbaxy                | RBx 11160/OZ 277 - Arterolane, | Malaria                                            | Antimalarial ozonide                                      | Heme iron Fe(II)    | 2003 <sup>(a)</sup> | Launched – MMV collaboration, then license                          | [69-71]    |
| 2                                                                                                                                | Piramal                | P1201                          | Diabetes                                           | NA                                                        | NA                  | 2007 <sup>(b)</sup> | In-licensed from Lilly – Phase 1 stop 2013                          | [97]       |
| 3                                                                                                                                | Piramal                | P2202                          | Diabetes                                           | 11 $\beta$ hydroxysteroid dehydrogenase type-1 inhibition | Oxidoreductase      | 2007 <sup>(b)</sup> | In-licensed from Lilly – Phase 2 stop 2014                          | [97]       |
| 4                                                                                                                                | Glenmark               | Crofelemer                     | Diarrhea                                           | Dual CFTR and CACC channel antagonism                     | Ion channels        | 2005 <sup>(b)</sup> | In-licensed from Napo Pharmaceuticals (2005)                        | [23]       |
| 5                                                                                                                                | Orchid                 | BLX-1002                       | Diabetes                                           | Non-PPAR AMPK activation                                  | Kinase (activation) | 2002 <sup>(a)</sup> | Partnered, from Bexel Biotechnologies, Phase 2 - stop 2015          | [197, 198] |
| 6                                                                                                                                | Orchid                 | DPOC-4088 (or DP-4088)         | Blood coagulation disorders (deep vein thrombosis) | Direct thrombin inhibition                                | Protease            | 2008 <sup>(a)</sup> | Partnered, from Diakron Pharmaceuticals 2008 – Phase 1 ongoing 2016 | [199, 200] |
| 7                                                                                                                                | Jubilant Life Sciences | JL-101 (CGI-1842)              | Oncology                                           | VEGFR2, EphB4 and PDGFR $\beta$ kinase inhibition         | Kinase              | 2008 <sup>(b)</sup> | Partnered, from CGI Pharmaceuticals, Phase 1 completed – stop 2012  | [236]      |
| 8                                                                                                                                | IPCA                   | CDRI97/78                      | Malaria                                            | Antimalarial ozonide                                      | Heme iron Fe(II)    | 2007 <sup>(b)</sup> | In-licensed from CDRI, Phase 1 – ongoing 2016                       | [246]      |
| 9                                                                                                                                | IPCA                   | CDRI99/411                     | Malaria                                            | Antimalarial ozonide                                      | Heme iron Fe(II)    | 2008 <sup>(b)</sup> | In-licensed from CDRI, preclinical – abandoned                      | [246]      |
| <p>Notes:<br/>                     (a) year development initiated<br/>                     (b) year in-licensed or partnered</p> |                        |                                |                                                    |                                                           |                     |                     |                                                                     |            |

**3. Table 7: Development timelines of proprietary development compounds at Indian companies (status mid-2016)**

| Entry | Compound               | Preclinical start | Preclinical STOP | Phase 1 start | Phase 1 STOP | Phase 2 start | Phase 2 STOP | Phase 3 start | Phase 3 STOP | Launch |
|-------|------------------------|-------------------|------------------|---------------|--------------|---------------|--------------|---------------|--------------|--------|
| 1     | DRF-2593/Balaglitazone | 1996              |                  | 1997          |              | 2000          |              | 2008          | 2011         |        |
| 2     | DRF 2725/Ragaglitazar  | 1998              |                  | 1999          |              | 2000          |              | 2001          | 2003         |        |
| 3     | DRF 1042               | 1998              |                  | 2000          |              | 2004          | 2011         |               |              |        |
| 4     | DRF 1644               | 2000              |                  | 2004          | 2005         |               |              |               |              |        |
| 5     | DRF-NPCC               | 2000              | 2003             |               |              |               |              |               |              |        |
| 6     | DRF-PPI                | 2000              | 2001             |               |              |               |              |               |              |        |
| 7     | DRF 3188               | 2001              | 2003             |               |              |               |              |               |              |        |
| 8     | DRF 4158/LBL-752       | 2000              | 2003             |               |              |               |              |               |              |        |
| 9     | DRF 4367               | 2000              | 2001             |               |              |               |              |               |              |        |
| 10    | DRF 4832               | 2001              | 2004             |               |              |               |              |               |              |        |
| 11    | DRF 4848               | 2001              | 2003             |               |              |               |              |               |              |        |
| 12    | NA                     | 2002              | 2003             |               |              |               |              |               |              |        |
| 13    | DRF 5265               | 2004              | 2005             |               |              |               |              |               |              |        |
| 14    | DRF 8417               | 2003              | 2003             |               |              |               |              |               |              |        |
| 15    | RUS 3108               | 2003              |                  | 2005          | 2008         |               |              |               |              |        |
| 16    | DRF 10945              | 2003              |                  | 2004          |              | 2006          | 2008         |               |              |        |
| 17    | DRF 11057              | 2003              | 2004             |               |              |               |              |               |              |        |
| 18    | DRL 11605              | 2004              |                  | 2006          | 2007         |               |              |               |              |        |
| 19    | DRL 12424              | 2006              | 2008             |               |              |               |              |               |              |        |
| 20    | DRF 13792              | 2004              | 2006             |               |              |               |              |               |              |        |
| 21    | DRL 16536              | 2006              | 2008             |               |              |               |              |               |              |        |
| 22    | DRL 16048              | 2007              | 2008             |               |              |               |              |               |              |        |
| 23    | NA                     | 2007              |                  | 2008          | 2008         |               |              |               |              |        |
| 24    | DRL 17822              | 2008              |                  | 2009          |              | 2011          | 2013         |               |              |        |
| 25    | DRL 19440              | 2010              | 2011             |               |              |               |              |               |              |        |
| 26    | DRL 21994              | 2009              |                  | 2010          | 2011         |               |              |               |              |        |

|    |                                      |      |      |      |         |      |         |  |  |  |
|----|--------------------------------------|------|------|------|---------|------|---------|--|--|--|
| 27 | DRL 21995                            | 2009 |      | 2010 | 2011    |      |         |  |  |  |
| 28 | RBx 2258/SPM-969/Parvosin, Pamirosin | 1998 |      | 1999 |         | 2001 | 2004    |  |  |  |
| 29 | RBx-4638/Clafrinast                  | 2000 |      | 2003 | 2003    |      |         |  |  |  |
| 30 | RBx 7644/Ranbezolid                  | 2000 |      | 2002 | 2004    |      |         |  |  |  |
| 31 | RBx 7796                             | 2001 |      | 2002 |         | 2003 | 2004    |  |  |  |
| 32 | RBx 9001                             | 2003 | 2004 |      |         |      |         |  |  |  |
| 33 | RBx 9841                             | 2003 |      | 2004 | 2006    |      |         |  |  |  |
| 34 | RBx 10558/PPD-10558                  | 2004 |      | 2006 |         | 2011 | 2011    |  |  |  |
| 35 | RBx 11082                            | 2004 | 2007 |      |         |      |         |  |  |  |
| 36 | RBx 11528                            | 2006 | 2007 |      |         |      |         |  |  |  |
| 37 | RBx 14016                            | 2005 | 2006 |      |         |      |         |  |  |  |
| 38 | RBx 14255                            | 2006 | 2008 |      |         |      |         |  |  |  |
| 39 | RBx 10014374                         | 2006 | 2007 |      |         |      |         |  |  |  |
| 40 | RBx 10017609                         | 2007 |      | 2008 |         | 2011 | 2013    |  |  |  |
| 41 | RBx 10017876                         | 2007 | 2008 |      |         |      |         |  |  |  |
| 42 | RBx 10019821                         | 2007 | 2008 |      |         |      |         |  |  |  |
| 43 | RBx 10020025                         | 2007 | 2008 |      |         |      |         |  |  |  |
| 44 | TRC-282                              | 2005 | 2006 |      |         |      |         |  |  |  |
| 45 | TRC-4186                             | 2002 |      | 2007 |         | 2009 | ongoing |  |  |  |
| 46 | TRC-8156                             | 2005 | 2006 |      |         |      |         |  |  |  |
| 47 | TRC-120038                           | 2008 | 2009 |      |         |      |         |  |  |  |
| 48 | TRC150094                            | 2008 |      | 2010 |         | 2014 | ongoing |  |  |  |
| 49 | TRC160334                            | 2012 |      | 2013 | ongoing |      |         |  |  |  |
| 50 | WCK 771/Levonadifloxacin             | 2000 |      | 2001 |         | 2004 | ongoing |  |  |  |
| 51 | WCK 919                              | 2000 | 2002 |      |         |      |         |  |  |  |
| 52 | WCK 993A                             | 2000 | 2001 |      |         |      |         |  |  |  |
| 53 | WCK 1152                             | 2002 |      | 2005 | 2012    |      |         |  |  |  |
| 54 | WCK 1153                             | 2001 | 2002 |      |         |      |         |  |  |  |
| 55 | WCK 1456                             | 2002 | 2003 |      |         |      |         |  |  |  |
| 56 | WCK 1457                             | 2003 | 2004 |      |         |      |         |  |  |  |
| 57 | WCK 1584                             | 2001 | 2002 |      |         |      |         |  |  |  |
| 58 | WCK 1734                             | 2004 | 2009 |      |         |      |         |  |  |  |
| 59 | WCK 2349/Alalevonadifloxacin         | 2006 |      | 2008 |         | 2011 | ongoing |  |  |  |
| 60 | WCK 2370                             | 2008 | 2009 |      |         |      |         |  |  |  |



|    |                               |      |         |      |         |      |         |      |  |      |
|----|-------------------------------|------|---------|------|---------|------|---------|------|--|------|
| 61 | WCK 2664                      | 2008 | 2009    |      |         |      |         |      |  |      |
| 62 | WCK 4086                      | 2010 | ongoing |      |         |      |         |      |  |      |
| 63 | WCK 4873/Nafitromycin         | 2010 |         | 2015 | ongoing |      |         |      |  |      |
| 64 | WCK 5107/Zidebactam           | 2014 |         | 2015 | ongoing |      |         |      |  |      |
| 65 | P276/Rivaciclib               | 2002 |         | 2005 |         | 2007 | 2013    |      |  |      |
| 66 | P664 (back-up compound)       | 2005 | 2006    |      |         |      |         |      |  |      |
| 67 | P979                          | 2004 | 2013    |      |         |      |         |      |  |      |
| 68 | P1446/Voruciclib              | 2007 |         | 2009 | 2015    |      |         |      |  |      |
| 69 | P1539                         | 2002 | 2003    |      |         |      |         |      |  |      |
| 70 | P1736                         | 2002 |         | 2008 |         | 2010 | 2014    |      |  |      |
| 71 | P1961A-06                     | 2007 |         | 2008 | 2009    |      |         |      |  |      |
| 72 | P2026                         | 2002 | 2003    |      |         |      |         |      |  |      |
| 73 | PM181104                      | 2008 | 2014    |      |         |      |         |      |  |      |
| 74 | P2745                         | 2010 |         | 2011 | 2013    |      |         |      |  |      |
| 75 | P3914                         | 2009 |         | 2012 | 2013    |      |         |      |  |      |
| 76 | PL225B/Target X               | 2011 |         | 2013 | 2014    |      |         |      |  |      |
| 77 | Target Y                      | 2012 | 2013    |      |         |      |         |      |  |      |
| 78 | P7170/Panulisib               | 2011 |         | 2013 | 2015    |      |         |      |  |      |
| 79 | P7435                         | 2011 |         | 2013 | 2015    |      |         |      |  |      |
| 80 | P11187                        | 2012 |         | 2013 | 2015    |      |         |      |  |      |
| 81 | SUN 1334H                     | 2003 |         | 2004 |         | 2007 | 2013    |      |  |      |
| 82 | SUN 09                        | 2007 |         | 2011 | 2013    |      |         |      |  |      |
| 83 | SUN 44                        | 2007 | 2013    |      |         |      |         |      |  |      |
| 84 | SUN 461                       | 2007 | 2010    |      |         |      |         |      |  |      |
| 85 | SUN 597                       | 2010 |         | 2011 | ongoing |      |         |      |  |      |
| 86 | SUN K706                      | 2011 |         | 2016 | ongoing |      |         |      |  |      |
| 87 | SUN L731                      | 2013 | 2015    |      |         |      |         |      |  |      |
| 88 | SUN K954                      | 2016 | ongoing |      |         |      |         |      |  |      |
| 89 | ZYH1/Saroglitazar (Lipaglyn™) | 2004 |         | 2005 |         | 2006 |         | 2009 |  | 2013 |
| 90 | ZYH2                          | 2005 |         | 2007 | 2012    |      |         |      |  |      |
| 91 | ZYO1                          | 2005 |         | 2007 | 2012    |      |         |      |  |      |
| 92 | ZYI1                          | 2005 |         | 2006 |         | 2007 | 2012    |      |  |      |
| 93 | ZYH7                          | 2007 |         | 2009 |         | 2012 | ongoing |      |  |      |
| 94 | ZYT1                          | 2008 |         | 2009 | 2012    |      |         |      |  |      |
| 95 | ZYD1                          | 2009 |         | 2010 | 2014    |      |         |      |  |      |

|     |                      |      |         |      |         |      |         |  |  |  |
|-----|----------------------|------|---------|------|---------|------|---------|--|--|--|
| 96  | ZYOG1                | 2009 |         | 2010 | 212     |      |         |  |  |  |
| 97  | ZYGK1                | 2011 |         | 2012 | 2014    |      |         |  |  |  |
| 98  | ZYPH0907             | 2011 |         | 2012 | 2014    |      |         |  |  |  |
| 99  | ZYG19                | 2011 |         | 2012 | 2015    |      |         |  |  |  |
| 100 | ZYGL241              | 2011 | 2012    |      |         |      |         |  |  |  |
| 101 | ZYDPLA1              | 2013 |         | 2014 | ongoing |      |         |  |  |  |
| 102 | ZYAN1                | 2014 |         | 2015 | ongoing |      |         |  |  |  |
| 103 | ZYTP1                | 2014 | ongoing |      |         |      |         |  |  |  |
| 104 | NCL-FDC-101          | 2006 | NA      |      |         |      |         |  |  |  |
| 105 | JB-7/G               | 2004 | 2005    |      |         |      |         |  |  |  |
| 106 | GRC 1087             | 2002 | 2004    |      |         |      |         |  |  |  |
| 107 | GRC 3015             | 2002 | 2004    |      |         |      |         |  |  |  |
| 108 | GRC 3566             | 2003 | 2005    |      |         |      |         |  |  |  |
| 109 | GRC 3590             | 2003 | 2004    |      |         |      |         |  |  |  |
| 110 | GRC 3785             | 2003 | 2004    |      |         |      |         |  |  |  |
| 111 | GRC 3886/Oglemilast  | 2004 |         | 2005 |         | 2006 | 2009    |  |  |  |
| 112 | GRC 4039/Revamilast  | 2006 |         | 2008 |         | 2011 | 2012    |  |  |  |
| 113 | GRC 6211             | 2006 |         | 2006 |         | 2007 | 2008    |  |  |  |
| 114 | GRC 8087             | 2004 | 2004    |      |         |      |         |  |  |  |
| 115 | GRC 8200/Melogliptin | 2004 |         | 2005 |         | 2006 | 2011    |  |  |  |
| 116 | GRC 9332             | 2008 | 2008    |      |         |      |         |  |  |  |
| 117 | GRC 10389            | 2006 | 2007    |      |         |      |         |  |  |  |
| 118 | GRC 10622            | 2006 | 2007    |      |         |      |         |  |  |  |
| 119 | GRC 10693/Tedalinab  | 2006 |         | 2008 | 2011    |      |         |  |  |  |
| 120 | GRC 10801            | 2006 | 2008    |      |         |      |         |  |  |  |
| 121 | GRC 15300/SAR292833  | 2008 |         | 2009 |         | 2012 | 2014    |  |  |  |
| 122 | GRC 17173            | 2008 | 2008    |      |         |      |         |  |  |  |
| 123 | GRC 17536            | 2010 |         | 2011 |         | 2013 | ongoing |  |  |  |
| 124 | GRC 27864            | 2012 |         | 2014 | ongoing |      |         |  |  |  |
| 125 | LL 3858/Sudoterb     | 2004 |         | 2005 |         | 2010 | 2015    |  |  |  |
| 126 | LL 4218/Desoside-P   | 2004 |         | 2005 |         | 2007 | 2010    |  |  |  |
| 127 | LL 6531              | 2008 | 2009    |      |         |      |         |  |  |  |
| 128 | LND 101001           | 2011 |         | 2012 |         | 2014 | ongoing |  |  |  |
| 129 | LNP 1892             | 2013 |         | 2014 | ongoing |      |         |  |  |  |
| 130 | LNP 3794             | 2013 |         | 2014 | ongoing |      |         |  |  |  |

|     |                        |      |                   |      |         |      |         |  |  |  |
|-----|------------------------|------|-------------------|------|---------|------|---------|--|--|--|
| 131 | LNP 1955               | 2014 |                   | 2015 |         | 2016 | ongoing |  |  |  |
| 132 | RSCL-0409              | 2007 | 2010              |      |         |      |         |  |  |  |
| 133 | RSCL-0520              | 2007 | 2010              |      |         |      |         |  |  |  |
| 134 | OCID 2987              | 2010 |                   | 2011 | 2015    |      |         |  |  |  |
| 135 | OCID 5005              | 2006 | 2006              |      |         |      |         |  |  |  |
| 136 | NA                     | 2007 | 2012              |      |         |      |         |  |  |  |
| 137 | OCID 4681              | 2010 |                   | 2012 | 2014    |      |         |  |  |  |
| 138 | OCID5090/AAI101        | 2012 |                   | 2014 | ongoing |      |         |  |  |  |
| 139 | SUVN-501               | 2009 | ongoing           |      |         |      |         |  |  |  |
| 140 | SUVN-502               | 2007 |                   | 2008 |         | 2015 | ongoing |  |  |  |
| 141 | SUVN-504               | 2008 | 2014              |      |         |      |         |  |  |  |
| 142 | SUVN-507               | 2009 | ongoing           |      |         |      |         |  |  |  |
| 143 | SUVN-512               | 2013 | ongoing           |      |         |      |         |  |  |  |
| 144 | SUVN-901               | 2009 | 2012              |      |         |      |         |  |  |  |
| 145 | SUVN-911               | 2010 | ongoing           |      |         |      |         |  |  |  |
| 146 | SUVN-976               | 2010 | 2015              |      |         |      |         |  |  |  |
| 147 | SUVN-D4010             | 2010 |                   | 2015 | ongoing |      |         |  |  |  |
| 148 | NA                     | 2009 | 2010              |      |         |      |         |  |  |  |
| 149 | SUVN-G3031             | 2012 |                   | 2014 | ongoing |      |         |  |  |  |
| 150 | NA                     | 2013 | ongoing           |      |         |      |         |  |  |  |
| 151 | NA                     | 2016 | ongoing           |      |         |      |         |  |  |  |
| 152 | NA                     | 2016 | ongoing           |      |         |      |         |  |  |  |
| 153 | NA                     | 2016 | ongoing           |      |         |      |         |  |  |  |
| 154 | NRC/AN/015             | 2006 | 2007              |      |         |      |         |  |  |  |
| 155 | NRC-AN-019             | 2006 |                   | 2009 |         | 2012 | ongoing |  |  |  |
| 156 | NRC 2694               | 2009 |                   | 2014 | ongoing |      |         |  |  |  |
| 157 | PBL 1427               | 2010 |                   | 2012 | ongoing |      |         |  |  |  |
| 158 | PBL 1920               | 2013 | NA <sup>(a)</sup> |      |         |      |         |  |  |  |
| 159 | PBL 2270               | 2010 | NA <sup>(a)</sup> |      |         |      |         |  |  |  |
| 160 | PBL 2958               | 2013 | NA <sup>(a)</sup> |      |         |      |         |  |  |  |
| 161 | MX 4007                | NA   |                   |      |         |      |         |  |  |  |
| 162 | MX 6001                | NA   |                   |      |         |      |         |  |  |  |
| 163 | NA – Hetero compound 1 | NA   |                   |      |         |      |         |  |  |  |
| 164 | NA – Hetero compound 2 | NA   |                   |      |         |      |         |  |  |  |
| 165 | JIEM-0186              | 2015 | ongoing           |      |         |      |         |  |  |  |

|     |                    |      |         |      |         |      |         |  |  |  |
|-----|--------------------|------|---------|------|---------|------|---------|--|--|--|
| 166 | JB1-097            | 2015 | ongoing |      |         |      |         |  |  |  |
| 167 | CK-103/JBET-050    | 2015 | ongoing |      |         |      |         |  |  |  |
| 168 | Alkem-43           | 2014 | 2015    |      |         |      |         |  |  |  |
| 169 | GKM-001/ADV1002401 | 2008 |         | 2009 |         | 2011 | ongoing |  |  |  |
| 170 | GKM-002            | 2012 | ongoing |      |         |      |         |  |  |  |
| 171 | PNQ-103            | 2011 | ongoing |      |         |      |         |  |  |  |
| 172 | PNQ-201            | 2011 | ongoing |      |         |      |         |  |  |  |
| 173 | PNQ-370            | 2014 | ongoing |      |         |      |         |  |  |  |
| 174 | PNQ-401            | 2013 | ongoing |      |         |      |         |  |  |  |
| 175 | PNQ-701            | 2015 | ongoing |      |         |      |         |  |  |  |
| 176 | PNQ-849            | 2015 | ongoing |      |         |      |         |  |  |  |
| 177 | PNQ-154            | 2015 | ongoing |      |         |      |         |  |  |  |
| 178 | PAT-1118           | 2014 | ongoing |      |         |      |         |  |  |  |
| 179 | PAT-1102           | 2014 | ongoing |      |         |      |         |  |  |  |
| 180 | Debio 1142         | 2011 | 2014    |      |         |      |         |  |  |  |
| 181 | AUNP-012/W014A     | 2012 | 2015    |      |         |      |         |  |  |  |
| 182 | ODM-207            | 2014 | ongoing |      |         |      |         |  |  |  |
| 183 | AU-4869            | 2014 | ongoing |      |         |      |         |  |  |  |
| 184 | CA-170/AUPM-170    | 2015 |         | 2016 | ongoing |      |         |  |  |  |
| 185 | CA-327/AUMP-327    | 2015 | ongoing |      |         |      |         |  |  |  |
| 186 | CA-4948/AU-4948    | 2015 | ongoing |      |         |      |         |  |  |  |
| 187 | NA                 | 2015 | ongoing |      |         |      |         |  |  |  |
| 188 | NA                 | 2015 | ongoing |      |         |      |         |  |  |  |
| 189 | NA                 | 2014 | ongoing |      |         |      |         |  |  |  |
| 190 | AEA16              | 2013 | 2015    |      |         |      |         |  |  |  |
| 191 | NA                 | 2013 | ongoing |      |         |      |         |  |  |  |
| 192 | GVK-Trkl           | 2016 | ongoing |      |         |      |         |  |  |  |
| 193 | KU-046             | 2013 |         | 2014 | ongoing |      |         |  |  |  |
| 194 | KU-5039            | 2013 |         | 2014 | ongoing |      |         |  |  |  |
| 195 | CNX-010-49         | 2011 | ongoing |      |         |      |         |  |  |  |
| 196 | CNX-011-67         | 2011 | ongoing |      |         |      |         |  |  |  |
| 197 | CNX-012-570        | 2013 | ongoing |      |         |      |         |  |  |  |
| 198 | CNX-013-B2         | 2014 | ongoing |      |         |      |         |  |  |  |
| 199 | RP1400             | 2014 | 2015    |      |         |      |         |  |  |  |
| 200 | RP-3128            | 2014 | ongoing |      |         |      |         |  |  |  |

|     |                   |      |         |      |         |      |                        |      |                        |  |
|-----|-------------------|------|---------|------|---------|------|------------------------|------|------------------------|--|
| 201 | TGR-1202/RP5264   | 2011 |         | 2013 |         | 2015 | ongoing <sup>(b)</sup> | 2016 | ongoing <sup>(c)</sup> |  |
| 202 | RP-6503           | 2013 | ongoing |      |         |      |                        |      |                        |  |
| 203 | RP-6530/Tenalisib | 2012 |         | 2013 | ongoing |      |                        |      |                        |  |
| 204 | RP10107           | 2016 | ongoing |      |         |      |                        |      |                        |  |
| 205 | SPR965            | 2014 | ongoing |      |         |      |                        |      |                        |  |
| 206 | SPR113            | 2015 | ongoing |      |         |      |                        |      |                        |  |
| 207 | RG70099/CRD1152   | 2014 | ongoing |      |         |      |                        |      |                        |  |
| 208 | H1T1007           | 2015 | ongoing |      |         |      |                        |      |                        |  |
| 209 | VB-1953           | 2015 | ongoing |      |         |      |                        |      |                        |  |
| 210 | NA                | 2015 | ongoing |      |         |      |                        |      |                        |  |
| 211 | VT-02-00068       | 2014 | ongoing |      |         |      |                        |      |                        |  |
| 212 | IO-125            | 2015 | ongoing |      |         |      |                        |      |                        |  |
| 213 | KBR1001/KBRPL1001 | 2015 | ongoing |      |         |      |                        |      |                        |  |
| 214 | KBR2001/KBRPL2001 | 2015 | ongoing |      |         |      |                        |      |                        |  |

(a) : Development status not disclosed – one single compound currently in preclinical development at Panacea Biotec

(b) : TGR-1202 as stand-alone treatment

(c) : TGR-1202 in combination with anti-CD20 mAb

#### 4. Table 8: Figures used for analysis and calculations

##### a. All development compounds by company and by year

|                                     | 1994 | 1995 | 1996 | 1997 | 1998 | 1999 | 2000 | 2001 | 2002 | 2003 | 2004 | 2005 | 2006 | 2007 | 2008 | 2009 | 2010 | 2011 | 2012 | 2013 | 2014 | 2015 | 2016 |
|-------------------------------------|------|------|------|------|------|------|------|------|------|------|------|------|------|------|------|------|------|------|------|------|------|------|------|
| 1. Major Pharmaceutical companies : |      |      |      |      |      |      |      |      |      |      |      |      |      |      |      |      |      |      |      |      |      |      |      |
| Dr Reddy's                          | 0    | 0    | 1    | 1    | 3    | 3    | 8    | 9    | 10   | 7    | 8    | 6    | 7    | 8    | 4    | 5    | 6    | 1    | 1    | 0    | 0    | 0    | 0    |
| Ranbaxy                             | 0    | 0    | 0    | 0    | 1    | 1    | 3    | 4    | 4    | 6    | 3    | 4    | 5    | 6    | 2    | 2    | 2    | 2    | 1    | 0    | 0    | 0    | 0    |
| Torrent                             | 0    | 0    | 0    | 0    | 0    | 0    | 0    | 0    | 1    | 1    | 1    | 3    | 1    | 1    | 3    | 2    | 2    | 2    | 3    | 3    | 3    | 3    | 3    |
| Wockhardt                           | 0    | 0    | 0    | 0    | 0    | 0    | 3    | 4    | 3    | 3    | 3    | 3    | 4    | 4    | 6    | 3    | 5    | 5    | 4    | 4    | 5    | 5    | 5    |
| Piramal                             | 0    | 0    | 0    | 0    | 0    | 0    | 0    | 0    | 4    | 2    | 3    | 4    | 3    | 5    | 6    | 6    | 7    | 10   | 12   | 8    | 4    | 2    | 0    |
| Sun Pharma                          | 0    | 0    | 0    | 0    | 0    | 0    | 0    | 0    | 0    | 1    | 1    | 1    | 1    | 4    | 4    | 4    | 4    | 5    | 5    | 3    | 3    | 3    | 3    |
| Zydus Cadila                        | 0    | 0    | 0    | 0    | 0    | 0    | 0    | 0    | 0    | 0    | 1    | 4    | 4    | 5    | 6    | 9    | 9    | 13   | 7    | 8    | 6    | 5    | 5    |
| JBCPL                               | 0    | 0    | 0    | 0    | 0    | 0    | 0    | 0    | 0    | 0    | 1    | 1    | 0    | 0    | 0    | 0    | 0    | 0    | 0    | 0    | 0    | 0    | 0    |
| Glenmark                            | 0    | 0    | 0    | 0    | 0    | 0    | 0    | 0    | 2    | 5    | 4    | 2    | 8    | 7    | 7    | 4    | 5    | 3    | 4    | 3    | 2    | 2    | 2    |
| Lupin                               | 0    | 0    | 0    | 0    | 0    | 0    | 0    | 0    | 0    | 0    | 2    | 2    | 2    | 2    | 3    | 2    | 1    | 2    | 2    | 4    | 5    | 4    | 4    |
| Reliance                            | 0    | 0    | 0    | 0    | 0    | 0    | 0    | 0    | 0    | 0    | 0    | 0    | 0    | 2    | 2    | 2    | 0    | 0    | 0    | 0    | 0    | 0    | 0    |
| Orchid                              | 0    | 0    | 0    | 0    | 0    | 0    | 0    | 0    | 0    | 0    | 0    | 0    | 1    | 1    | 1    | 1    | 3    | 3    | 3    | 3    | 2    | 1    | 1    |
| Suven                               | 0    | 0    | 0    | 0    | 0    | 0    | 0    | 0    | 0    | 0    | 0    | 0    | 0    | 1    | 2    | 6    | 8    | 8    | 8    | 10   | 9    | 8    | 11   |
| Natco                               | 0    | 0    | 0    | 0    | 0    | 0    | 0    | 0    | 0    | 0    | 0    | 0    | 2    | 1    | 1    | 2    | 2    | 2    | 2    | 2    | 2    | 2    | 2    |
| Panacea                             | 0    | 0    | 0    | 0    | 0    | 0    | 0    | 0    | 0    | 0    | 0    | 0    | 0    | 0    | 0    | 0    | 2    | 2    | 2    | 4    | 4    | 4    | 2    |
| Hetero                              | 0    | 0    | 0    | 0    | 0    | 0    | 0    | 0    | 0    | 0    | 0    | 0    | 0    | 0    | 0    | 0    | 0    | 0    | 2    | 0    | 0    | 0    | 0    |
| Jubilant                            | 0    | 0    | 0    | 0    | 0    | 0    | 0    | 0    | 0    | 0    | 0    | 0    | 0    | 0    | 0    | 0    | 0    | 0    | 0    | 0    | 0    | 3    | 3    |
| Alkem                               | 0    | 0    | 0    | 0    | 0    | 0    | 0    | 0    | 0    | 0    | 0    | 0    | 0    | 0    | 0    | 0    | 0    | 0    | 0    | 0    | 1    | 1    | 0    |
| Total pharma :                      | 0    | 0    | 1    | 1    | 4    | 4    | 14   | 17   | 24   | 25   | 27   | 30   | 38   | 47   | 47   | 48   | 56   | 58   | 56   | 52   | 46   | 43   | 41   |
| 2. Biotech and start-up companies : |      |      |      |      |      |      |      |      |      |      |      |      |      |      |      |      |      |      |      |      |      |      |      |
| Advinus                             | 0    | 0    | 0    | 0    | 0    | 0    | 0    | 0    | 0    | 0    | 0    | 0    | 0    | 0    | 1    | 1    | 1    | 3    | 4    | 5    | 6    | 9    | 9    |
| Anthem                              | 0    | 0    | 0    | 0    | 0    | 0    | 0    | 0    | 0    | 0    | 0    | 0    | 0    | 0    | 0    | 0    | 0    | 0    | 0    | 0    | 2    | 2    | 2    |
| Aurigene                            | 0    | 0    | 0    | 0    | 0    | 0    | 0    | 0    | 0    | 0    | 0    | 0    | 0    | 0    | 0    | 0    | 0    | 1    | 2    | 5    | 6    | 9    | 9    |
| GVK Bio                             | 0    | 0    | 0    | 0    | 0    | 0    | 0    | 0    | 0    | 0    | 0    | 0    | 0    | 0    | 0    | 0    | 0    | 0    | 0    | 0    | 0    | 0    | 1    |

|                 |   |   |   |   |   |   |    |    |    |    |    |    |    |    |    |    |    |    |    |    |    |    |    |
|-----------------|---|---|---|---|---|---|----|----|----|----|----|----|----|----|----|----|----|----|----|----|----|----|----|
| Kareus          | 0 | 0 | 0 | 0 | 0 | 0 | 0  | 0  | 0  | 0  | 0  | 0  | 0  | 0  | 0  | 0  | 0  | 0  | 0  | 2  | 2  | 2  | 2  |
| Connexios       | 0 | 0 | 0 | 0 | 0 | 0 | 0  | 0  | 0  | 0  | 0  | 0  | 0  | 0  | 0  | 0  | 0  | 2  | 2  | 3  | 4  | 4  | 4  |
| Rhizen          | 0 | 0 | 0 | 0 | 0 | 0 | 0  | 0  | 0  | 0  | 0  | 0  | 0  | 0  | 0  | 0  | 0  | 1  | 2  | 3  | 5  | 4  | 5  |
| Sphaera         | 0 | 0 | 0 | 0 | 0 | 0 | 0  | 0  | 0  | 0  | 0  | 0  | 0  | 0  | 0  | 0  | 0  | 0  | 0  | 0  | 1  | 2  | 2  |
| Curadev         | 0 | 0 | 0 | 0 | 0 | 0 | 0  | 0  | 0  | 0  | 0  | 0  | 0  | 0  | 0  | 0  | 0  | 0  | 0  | 0  | 1  | 1  | 1  |
| Shantani        | 0 | 0 | 0 | 0 | 0 | 0 | 0  | 0  | 0  | 0  | 0  | 0  | 0  | 0  | 0  | 0  | 0  | 0  | 0  | 0  | 0  | 1  | 1  |
| Vyome           | 0 | 0 | 0 | 0 | 0 | 0 | 0  | 0  | 0  | 0  | 0  | 0  | 0  | 0  | 0  | 0  | 0  | 0  | 0  | 0  | 0  | 1  | 2  |
| Vitas           | 0 | 0 | 0 | 0 | 0 | 0 | 0  | 0  | 0  | 0  | 0  | 0  | 0  | 0  | 0  | 0  | 0  | 0  | 0  | 0  | 1  | 1  | 1  |
| Invictus        | 0 | 0 | 0 | 0 | 0 | 0 | 0  | 0  | 0  | 0  | 0  | 0  | 0  | 0  | 0  | 0  | 0  | 0  | 0  | 0  | 0  | 1  | 1  |
| Krish Biotech   | 0 | 0 | 0 | 0 | 0 | 0 | 0  | 0  | 0  | 0  | 0  | 0  | 0  | 0  | 0  | 0  | 0  | 0  | 0  | 0  | 0  | 2  | 2  |
| Total biotech : | 0 | 0 | 0 | 0 | 0 | 0 | 0  | 0  | 0  | 0  | 0  | 0  | 0  | 0  | 1  | 1  | 1  | 7  | 10 | 18 | 28 | 39 | 42 |
| Grand Total :   | 0 | 0 | 1 | 1 | 4 | 4 | 14 | 17 | 24 | 25 | 27 | 30 | 38 | 47 | 48 | 49 | 57 | 65 | 66 | 70 | 74 | 82 | 83 |

**b. Development compounds by phase and by year**

| Phase       | 1994 | 1995 | 1996 | 1997 | 1998 | 1999 | 2000 | 2001 | 2002 | 2003 | 2004 | 2005 | 2006 | 2007 | 2008 | 2009 | 2010 | 2011 | 2012 | 2013 | 2014 | 2015 | 2016 |
|-------------|------|------|------|------|------|------|------|------|------|------|------|------|------|------|------|------|------|------|------|------|------|------|------|
| Preclinical | 0    | 0    | 1    | 0    | 3    | 1    | 10   | 12   | 17   | 18   | 20   | 16   | 21   | 28   | 24   | 21   | 25   | 34   | 34   | 38   | 42   | 50   | 51   |
| Phase 1     | 0    | 0    | 0    | 1    | 1    | 3    | 2    | 2    | 4    | 4    | 4    | 11   | 11   | 8    | 15   | 19   | 22   | 17   | 16   | 19   | 21   | 20   | 19   |
| Phase 2     | 0    | 0    | 0    | 0    | 0    | 0    | 2    | 2    | 2    | 3    | 3    | 3    | 6    | 11   | 8    | 7    | 8    | 13   | 15   | 12   | 10   | 11   | 11   |
| Phase 3     | 0    | 0    | 0    | 0    | 0    | 0    | 0    | 1    | 1    | 0    | 0    | 0    | 0    | 0    | 1    | 2    | 2    | 1    | 1    | 0    | 0    | 0    | 1    |
| Launched    | 0    | 0    | 0    | 0    | 0    | 0    | 0    | 0    | 0    | 0    | 0    | 0    | 0    | 0    | 0    | 0    | 0    | 0    | 0    | 1    | 1    | 1    | 1    |
| Total :     | 0    | 0    | 1    | 1    | 4    | 4    | 14   | 17   | 24   | 25   | 27   | 30   | 38   | 47   | 48   | 49   | 57   | 65   | 66   | 70   | 74   | 82   | 83   |

**b.1. Preclinical compounds by company and by year**

|            | 1994 | 1995 | 1996 | 1997 | 1998 | 1999 | 2000 | 2001 | 2002 | 2003 | 2004 | 2005 | 2006 | 2007 | 2008 | 2009 | 2010 | 2011 | 2012 | 2013 | 2014 | 2015 | 2016 |
|------------|------|------|------|------|------|------|------|------|------|------|------|------|------|------|------|------|------|------|------|------|------|------|------|
| Dr Reddy's |      |      | 1    |      | 2    | 1    | 5    | 6    | 7    | 5    | 4    | 2    | 2    | 4    | 1    | 2    | 1    |      |      |      |      |      |      |
| Ranbaxy    |      |      |      |      | 1    |      | 2    | 3    | 1    | 2    | 2    | 3    | 4    | 5    |      |      |      |      |      |      |      |      |      |
| Torrent    |      |      |      |      |      |      |      |      | 1    | 1    | 1    | 3    | 1    |      | 2    | 1    |      |      | 1    |      |      |      |      |

|                   |   |   |   |   |   |   |    |    |    |    |    |    |    |    |    |    |    |    |    |    |    |    |    |
|-------------------|---|---|---|---|---|---|----|----|----|----|----|----|----|----|----|----|----|----|----|----|----|----|----|
| Wockhardt         |   |   |   |   |   |   | 3  | 3  | 2  | 2  | 2  | 1  | 2  | 2  | 3  |    | 2  | 2  | 2  | 2  | 3  | 1  | 1  |
| Piramal           |   |   |   |   |   |   |    |    | 4  | 2  | 3  | 3  | 2  | 4  | 3  | 3  | 4  | 6  | 7  | 1  |    |    |    |
| Sun Pharma        |   |   |   |   |   |   |    |    |    | 1  |    |    |    | 3  | 3  | 3  | 3  | 2  | 2  | 2  | 2  | 2  | 1  |
| Zydus Cadila      |   |   |   |   |   |   |    |    |    |    | 1  | 3  | 2  | 1  | 2  | 3  | 1  | 5  | 0  | 1  | 2  | 1  | 1  |
| JBCPL             |   |   |   |   |   |   |    |    |    |    | 1  | 1  |    |    |    |    |    |    |    |    |    |    |    |
| Glenmark          |   |   |   |   |   |   |    |    | 2  | 5  | 4  | 0  | 5  | 4  | 3  |    | 1  |    | 1  | 1  |    |    |    |
| Lupin             |   |   |   |   |   |   |    |    |    |    | 2  |    |    |    | 1  |    |    | 1  |    | 2  | 1  |    |    |
| Reliance          |   |   |   |   |   |   |    |    |    |    |    |    |    | 2  | 2  | 2  |    |    |    |    |    |    |    |
| Orchid            |   |   |   |   |   |   |    |    |    |    |    |    | 1  | 1  | 1  | 1  | 3  | 2  | 1  | 1  |    |    |    |
| Suven             |   |   |   |   |   |   |    |    |    |    |    |    |    | 1  | 1  | 5  | 7  | 7  | 7  | 9  | 7  | 5  | 8  |
| Natco             |   |   |   |   |   |   |    |    |    |    |    |    | 2  | 1  | 1  | 1  | 1  | 1  | 1  | 1  |    |    |    |
| Panacea           |   |   |   |   |   |   |    |    |    |    |    |    |    |    |    |    | 2  | 2  | 1  | 3  | 3  | 3  | 1  |
| Hetero            |   |   |   |   |   |   |    |    |    |    |    |    |    |    |    |    |    |    | 2  |    |    |    |    |
| Jubilant          |   |   |   |   |   |   |    |    |    |    |    |    |    |    |    |    |    |    |    |    |    | 3  | 3  |
| Alkem             |   |   |   |   |   |   |    |    |    |    |    |    |    |    |    |    |    |    |    |    | 1  | 1  | 0  |
| Advinus           |   |   |   |   |   |   |    |    |    |    |    |    |    |    | 1  |    |    | 2  | 3  | 4  | 5  | 8  | 8  |
| Anthem            |   |   |   |   |   |   |    |    |    |    |    |    |    |    |    |    |    |    |    |    | 2  | 2  | 2  |
| Aurigene          |   |   |   |   |   |   |    |    |    |    |    |    |    |    |    |    |    | 1  | 2  | 5  | 6  | 9  | 8  |
| GVK Bio           |   |   |   |   |   |   |    |    |    |    |    |    |    |    |    |    |    |    |    |    |    |    | 1  |
| Kareus            |   |   |   |   |   |   |    |    |    |    |    |    |    |    |    |    |    |    |    | 2  |    |    |    |
| Connexios         |   |   |   |   |   |   |    |    |    |    |    |    |    |    |    |    |    | 2  | 2  | 3  | 4  | 4  | 4  |
| Rhizen            |   |   |   |   |   |   |    |    |    |    |    |    |    |    |    |    |    | 1  | 2  | 1  | 3  | 2  | 3  |
| Sphaera           |   |   |   |   |   |   |    |    |    |    |    |    |    |    |    |    |    |    |    |    | 1  | 2  | 2  |
| Curadev           |   |   |   |   |   |   |    |    |    |    |    |    |    |    |    |    |    |    |    |    | 1  | 1  | 1  |
| Shantani          |   |   |   |   |   |   |    |    |    |    |    |    |    |    |    |    |    |    |    |    |    | 1  | 1  |
| Vyome             |   |   |   |   |   |   |    |    |    |    |    |    |    |    |    |    |    |    |    |    |    | 1  | 2  |
| Vitas             |   |   |   |   |   |   |    |    |    |    |    |    |    |    |    |    |    |    |    |    | 1  | 1  | 1  |
| Invictus          |   |   |   |   |   |   |    |    |    |    |    |    |    |    |    |    |    |    |    |    |    | 1  | 1  |
| Krish Biotech     |   |   |   |   |   |   |    |    |    |    |    |    |    |    |    |    |    |    |    |    |    | 2  | 2  |
| Preclinical total | 0 | 0 | 1 | 0 | 3 | 1 | 10 | 12 | 17 | 18 | 20 | 16 | 21 | 28 | 24 | 21 | 25 | 34 | 34 | 38 | 42 | 50 | 51 |



**b.2. Phase 1 compounds by company and by year**

|               | 1994 | 1995 | 1996 | 1997 | 1998 | 1999 | 2000 | 2001 | 2002 | 2003 | 2004 | 2005 | 2006 | 2007 | 2008 | 2009 | 2010 | 2011 | 2012 | 2013 | 2014 | 2015 | 2016 |
|---------------|------|------|------|------|------|------|------|------|------|------|------|------|------|------|------|------|------|------|------|------|------|------|------|
| Dr Reddy's    |      |      |      | 1    | 1    | 2    | 1    | 1    | 1    | 1    | 2    | 2    | 3    | 2    | 2    | 2    | 4    |      |      |      |      |      |      |
| Ranbaxy       |      |      |      |      |      | 1    | 1    |      | 2    | 2    | 1    | 1    | 1    | 1    | 2    | 2    | 2    |      |      |      |      |      |      |
| Torrent       |      |      |      |      |      |      |      |      |      |      |      |      |      | 1    | 1    |      | 1    | 1    | 1    | 2    | 1    | 1    | 1    |
| Wockhardt     |      |      |      |      |      |      |      | 1    | 1    | 1    |      | 1    | 1    | 1    | 2    | 2    | 2    | 1    |      |      |      | 2    | 2    |
| Piramal       |      |      |      |      |      |      |      |      |      |      |      | 1    | 1    |      | 2    | 2    | 1    | 2    | 3    | 5    | 4    | 2    |      |
| Sun Pharma    |      |      |      |      |      |      |      |      |      |      | 1    | 1    | 1    |      |      |      |      | 2    | 2    | 1    | 1    | 1    | 2    |
| Zydus Cadila  |      |      |      |      |      |      |      |      |      |      |      | 1    | 1    | 2    | 2    | 4    | 6    | 6    | 4    | 4    | 2    | 2    | 2    |
| Glenmark      |      |      |      |      |      |      |      |      |      |      |      | 2    | 1    |      | 2    | 3    | 3    | 2    | 1    |      | 1    | 1    | 1    |
| Lupin         |      |      |      |      |      |      |      |      |      |      |      | 2    | 2    | 1    | 1    | 1    |      |      | 1    | 1    | 2    | 3    | 2    |
| Orchid        |      |      |      |      |      |      |      |      |      |      |      |      |      |      |      |      |      | 1    | 2    | 2    | 2    | 1    | 1    |
| Suven         |      |      |      |      |      |      |      |      |      |      |      |      |      |      | 1    | 1    | 1    | 1    | 1    | 1    | 2    | 2    | 2    |
| Natco         |      |      |      |      |      |      |      |      |      |      |      |      |      |      |      | 1    | 1    | 1    |      |      | 1    | 1    | 1    |
| Panacea       |      |      |      |      |      |      |      |      |      |      |      |      |      |      |      |      |      |      | 1    | 1    | 1    | 1    | 1    |
| Advinus       |      |      |      |      |      |      |      |      |      |      |      |      |      |      |      | 1    | 1    |      |      |      |      |      |      |
| Aurigene      |      |      |      |      |      |      |      |      |      |      |      |      |      |      |      |      |      |      |      |      |      |      | 1    |
| Kareus        |      |      |      |      |      |      |      |      |      |      |      |      |      |      |      |      |      |      |      |      | 2    | 2    | 2    |
| Rhizen        |      |      |      |      |      |      |      |      |      |      |      |      |      |      |      |      |      |      |      | 2    | 2    | 1    | 1    |
| Phase 1 total | 0    | 0    | 0    | 1    | 1    | 3    | 2    | 2    | 4    | 4    | 4    | 11   | 11   | 8    | 15   | 19   | 22   | 17   | 16   | 19   | 21   | 20   | 19   |

**b.3. Phase 2 compounds by company and by year**

|            | 1994 | 1995 | 1996 | 1997 | 1998 | 1999 | 2000 | 2001 | 2002 | 2003 | 2004 | 2005 | 2006 | 2007 | 2008 | 2009 | 2010 | 2011 | 2012 | 2013 | 2014 | 2015 | 2016 |
|------------|------|------|------|------|------|------|------|------|------|------|------|------|------|------|------|------|------|------|------|------|------|------|------|
| Dr Reddy's |      |      |      |      |      |      | 2    | 1    | 1    | 1    | 2    | 2    | 2    | 2    |      |      |      | 1    | 1    |      |      |      |      |
| Ranbaxy    |      |      |      |      |      |      |      | 1    | 1    | 2    |      |      |      |      |      |      |      | 2    | 1    |      |      |      |      |
| Torrent    |      |      |      |      |      |      |      |      |      |      |      |      |      |      |      | 1    | 1    | 1    | 1    | 1    | 2    | 2    | 2    |
| Wockhardt  |      |      |      |      |      |      |      |      |      |      | 1    | 1    | 1    | 1    | 1    | 1    | 1    | 2    | 2    | 2    | 2    | 2    | 2    |
| Piramal    |      |      |      |      |      |      |      |      |      |      |      |      |      | 1    | 1    | 1    | 2    | 2    | 2    | 2    |      |      |      |

|              |   |   |   |   |   |   |   |   |   |   |   |   |   |    |   |   |   |    |    |    |    |    |    |    |   |
|--------------|---|---|---|---|---|---|---|---|---|---|---|---|---|----|---|---|---|----|----|----|----|----|----|----|---|
| Sun Pharma   |   |   |   |   |   |   |   |   |   |   |   |   |   |    | 1 | 1 | 1 | 1  | 1  | 1  |    |    |    |    |   |
| Zydus Cadila |   |   |   |   |   |   |   |   |   |   |   |   |   |    | 1 | 2 | 2 | 1  | 1  | 1  | 2  | 2  | 1  | 1  | 1 |
| Glenmark     |   |   |   |   |   |   |   |   |   |   |   |   |   |    | 2 | 3 | 2 | 1  | 1  | 1  | 2  | 2  | 1  | 1  | 1 |
| Lupin        |   |   |   |   |   |   |   |   |   |   |   |   |   |    |   | 1 | 1 | 1  | 1  | 1  | 1  | 1  | 2  | 1  | 2 |
| Suven        |   |   |   |   |   |   |   |   |   |   |   |   |   |    |   |   |   |    |    |    |    |    |    | 1  | 1 |
| Natco        |   |   |   |   |   |   |   |   |   |   |   |   |   |    |   |   |   |    |    | 1  | 1  | 1  | 1  | 1  | 1 |
| Advinus      |   |   |   |   |   |   |   |   |   |   |   |   |   |    |   |   |   |    | 1  | 1  | 1  | 1  | 1  | 1  | 1 |
| Rhizen       |   |   |   |   |   |   |   |   |   |   |   |   |   |    |   |   |   |    |    |    |    |    |    | 1  |   |
| Phase 2      | 0 | 0 | 0 | 0 | 0 | 0 | 2 | 2 | 2 | 3 | 3 | 3 | 6 | 11 | 8 | 7 | 8 | 13 | 15 | 12 | 10 | 11 | 11 | 11 |   |

**b.4. Phase 3 compounds by company and by year**

| Phase        | 1994 | 1995 | 1996 | 1997 | 1998 | 1999 | 2000 | 2001 | 2002 | 2003 | 2004 | 2005 | 2006 | 2007 | 2008 | 2009 | 2010 | 2011 | 2012 | 2013 | 2014 | 2015 | 2016 |
|--------------|------|------|------|------|------|------|------|------|------|------|------|------|------|------|------|------|------|------|------|------|------|------|------|
| Dr Reddy's   |      |      |      |      |      |      |      | 1    | 1    |      |      |      |      |      | 1    | 1    | 1    |      |      |      |      |      |      |
| Zydus Cadila |      |      |      |      |      |      |      |      |      |      |      |      |      |      |      | 1    | 1    | 1    | 1    |      |      |      |      |
| Rhizen       |      |      |      |      |      |      |      |      |      |      |      |      |      |      |      |      |      |      |      |      |      |      | 1    |
| Phase 3      | 0    | 0    | 0    | 0    | 0    | 0    | 0    | 1    | 1    | 0    | 0    | 0    | 0    | 0    | 1    | 2    | 2    | 1    | 1    | 0    | 0    | 0    | 1    |

**b.5. Launched compounds**

| Phase          | 1994 | 1995 | 1996 | 1997 | 1998 | 1999 | 2000 | 2001 | 2002 | 2003 | 2004 | 2005 | 2006 | 2007 | 2008 | 2009 | 2010 | 2011 | 2012 | 2013 | 2014 | 2015 | 2016 |
|----------------|------|------|------|------|------|------|------|------|------|------|------|------|------|------|------|------|------|------|------|------|------|------|------|
| Zydus Cadila   |      |      |      |      |      |      |      |      |      |      |      |      |      |      |      |      |      |      |      | 1    | 1    | 1    | 1    |
| Launched total | 0    | 0    | 0    | 0    | 0    | 0    | 0    | 0    | 0    | 0    | 0    | 0    | 0    | 0    | 0    | 0    | 0    | 0    | 0    | 1    | 1    | 1    | 1    |

**c. Development compounds by indication**

|                                | Endocrinology/<br>metabolics | Oncology | Infections | Immunology/<br>Rheumatology | Neurology | Pulmonary/<br>Respiratory disorders | Cardiovascular<br>disorders | Urology | Musculoskeletal | Nephrology | Psychiatry/<br>Psychology | Otolaryngology | Dermatology | Gastrointestinal |
|--------------------------------|------------------------------|----------|------------|-----------------------------|-----------|-------------------------------------|-----------------------------|---------|-----------------|------------|---------------------------|----------------|-------------|------------------|
| Dr Reddy's                     | 11                           | 4        | 5          | 2                           | 0         | 1                                   | 3                           | 0       | 0               | 0          | 0                         | 0              | 0           | 1                |
| Ranbaxy                        | 3                            | 0        | 2          | 0                           | 0         | 7                                   | 0                           | 4       | 0               | 0          | 0                         | 0              | 0           | 0                |
| Torrent                        | 2                            | 0        | 0          | 1                           | 0         | 0                                   | 3                           | 0       | 0               | 1          | 0                         | 0              | 0           | 0                |
| Wockhardt                      | 0                            | 0        | 15         | 0                           | 0         | 0                                   | 0                           | 0       | 0               | 0          | 0                         | 0              | 0           | 0                |
| Piramal                        | 3                            | 8        | 1          | 5                           | 0         | 0                                   | 0                           | 0       | 0               | 0          | 0                         | 0              | 0           | 0                |
| Sun                            | 0                            | 2        | 0          | 1                           | 1         | 1                                   | 0                           | 0       | 1               | 0          | 0                         | 2              | 1           | 0                |
| Zydus Cadila                   | 11                           | 1        | 0          | 1                           | 0         | 0                                   | 0                           | 0       | 1               | 1          | 0                         | 0              | 0           | 0                |
| FDC Limited                    | 0                            | 0        | 1          | 0                           | 0         | 0                                   | 0                           | 0       | 0               | 0          | 0                         | 0              | 0           | 0                |
| JB Chemicals & Pharmaceuticals | 0                            | 0        | 0          | 1                           | 0         | 0                                   | 0                           | 0       | 0               | 0          | 0                         | 0              | 0           | 0                |
| Glenmark                       | 6                            | 0        | 0          | 2                           | 5         | 8                                   | 0                           | 1       | 0               | 0          | 0                         | 0              | 0           | 0                |
| Lupin                          | 2                            | 1        | 1          | 2                           | 1         | 0                                   | 0                           | 0       | 0               | 1          | 0                         | 0              | 0           | 0                |
| Reliance Life Sciences         | 0                            | 0        | 0          | 2                           | 0         | 0                                   | 0                           | 0       | 0               | 0          | 0                         | 0              | 0           | 0                |
| Orchid                         | 0                            | 2        | 1          | 1                           | 0         | 1                                   | 0                           | 0       | 0               | 0          | 0                         | 0              | 0           | 0                |
| Suven                          | 0                            | 0        | 0          | 0                           | 13        | 0                                   | 0                           | 0       | 0               | 0          | 2                         | 0              | 0           | 0                |
| Natco                          | 0                            | 3        | 0          | 0                           | 0         | 0                                   | 0                           | 0       | 0               | 0          | 0                         | 0              | 0           | 0                |
| Panacea                        | 2                            | 0        | 1          | 0                           | 0         | 0                                   | 0                           | 0       | 0               | 0          | 1                         | 0              | 0           | 0                |
| Matrix Laboratories            | 1                            | 0        | 0          | 1                           | 0         | 0                                   | 0                           | 0       | 0               | 0          | 0                         | 0              | 0           | 0                |
| Hetero Drugs                   | 0                            | 0        | 2          | 0                           | 0         | 0                                   | 0                           | 0       | 0               | 0          | 0                         | 0              | 0           | 0                |
| Jubilant                       | 0                            | 3        | 0          | 0                           | 0         | 0                                   | 0                           | 0       | 0               | 0          | 0                         | 0              | 0           | 0                |
| Alkem                          | 0                            | 0        | 0          | 0                           | 0         | 0                                   | 0                           | 0       | 1               | 0          | 0                         | 0              | 0           | 0                |
| Advinus                        | 2                            | 7        | 0          | 4                           | 0         | 1                                   | 0                           | 0       | 0               | 0          | 0                         | 0              | 0           | 0                |
| Anthem                         | 0                            | 2        | 0          | 0                           | 0         | 0                                   | 0                           | 0       | 0               | 0          | 0                         | 0              | 0           | 0                |

|           |    |    |    |    |    |    |   |   |   |   |   |   |   |   |
|-----------|----|----|----|----|----|----|---|---|---|---|---|---|---|---|
| Aurigene  | 0  | 9  | 2  | 1  | 0  | 0  | 0 | 0 | 0 | 0 | 0 | 0 | 0 | 0 |
| GVK Bio   | 0  | 1  | 0  | 0  | 0  | 0  | 0 | 0 | 0 | 0 | 0 | 0 | 0 | 0 |
| Kareus    | 1  | 0  | 0  | 0  | 1  | 0  | 0 | 0 | 0 | 0 | 0 | 0 | 0 | 0 |
| Connexios | 4  | 0  | 0  | 0  | 0  | 0  | 0 | 0 | 0 | 0 | 0 | 0 | 0 | 0 |
| Rhizen    | 0  | 4  | 0  | 1  | 0  | 2  | 0 | 0 | 0 | 0 | 0 | 0 | 0 | 0 |
| Sphaera   | 0  | 1  | 1  | 0  | 0  | 0  | 0 | 0 | 0 | 0 | 0 | 0 | 0 | 0 |
| Curadev   | 0  | 1  | 0  | 0  | 0  | 0  | 0 | 0 | 0 | 0 | 0 | 0 | 0 | 0 |
| Shantani  | 1  | 0  | 0  | 0  | 0  | 0  | 0 | 0 | 0 | 0 | 0 | 0 | 0 | 0 |
| Vyome     | 0  | 0  | 2  | 0  | 0  | 0  | 0 | 0 | 0 | 0 | 0 | 0 | 0 | 0 |
| Vitas     | 0  | 0  | 1  | 0  | 0  | 0  | 0 | 0 | 0 | 0 | 0 | 0 | 0 | 0 |
| Invictus  | 0  | 1  | 0  | 0  | 0  | 0  | 0 | 0 | 0 | 0 | 0 | 0 | 0 | 0 |
| Krish Bio | 1  | 0  | 0  | 1  | 0  | 0  | 0 | 0 | 0 | 0 | 0 | 0 | 0 | 0 |
| Total :   | 50 | 50 | 35 | 26 | 21 | 21 | 6 | 5 | 3 | 3 | 3 | 2 | 1 | 1 |

**d. Therapeutic indications by company**

|              | Endocrinology /<br>metabolics | Oncology | Infections | Immunology/<br>Rheumatology | Neurology | Pulmonary/<br>Respiratory disorders | Cardiovascular<br>disorders | Urology | Musculoskeletal | Nephrology | Psychiatry/<br>Psychology | Otolaryngology | Dermatology | Gastrointestinal |
|--------------|-------------------------------|----------|------------|-----------------------------|-----------|-------------------------------------|-----------------------------|---------|-----------------|------------|---------------------------|----------------|-------------|------------------|
| Dr Reddy's   | 11                            | 4        | 5          | 2                           | 0         | 1                                   | 3                           | 0       | 0               | 0          | 0                         | 0              | 0           | 1                |
| Glenmark     | 6                             | 0        | 0          | 2                           | 5         | 8                                   | 0                           | 1       | 0               | 0          | 0                         | 0              | 0           | 0                |
| Piramal      | 3                             | 8        | 1          | 5                           | 0         | 0                                   | 0                           | 0       | 0               | 0          | 0                         | 0              | 0           | 0                |
| Ranbaxy      | 3                             | 0        | 2          | 0                           | 0         | 7                                   | 0                           | 4       | 0               | 0          | 0                         | 0              | 0           | 0                |
| Wockhardt    | 0                             | 0        | 15         | 0                           | 0         | 0                                   | 0                           | 0       | 0               | 0          | 0                         | 0              | 0           | 0                |
| Zydus Cadila | 11                            | 1        | 0          | 1                           | 0         | 0                                   | 0                           | 0       | 1               | 1          | 0                         | 0              | 0           | 0                |
| Suven        | 0                             | 0        | 0          | 0                           | 13        | 0                                   | 0                           | 0       | 0               | 0          | 2                         | 0              | 0           | 0                |

|                                |    |    |    |    |    |    |   |   |   |   |   |   |   |   |
|--------------------------------|----|----|----|----|----|----|---|---|---|---|---|---|---|---|
| Advinus                        | 2  | 7  | 0  | 4  | 0  | 1  | 0 | 0 | 0 | 0 | 0 | 0 | 0 | 0 |
| Aurigen                        | 0  | 9  | 2  | 1  | 0  | 0  | 0 | 0 | 0 | 0 | 0 | 0 | 0 | 0 |
| Sun                            | 0  | 2  | 0  | 1  | 1  | 1  | 0 | 0 | 1 | 0 | 0 | 2 | 1 | 0 |
| Lupin                          | 2  | 1  | 1  | 2  | 1  | 0  | 0 | 0 | 0 | 1 | 0 | 0 | 0 | 0 |
| Torrent                        | 2  | 0  | 0  | 1  | 0  | 0  | 3 | 0 | 0 | 1 | 0 | 0 | 0 | 0 |
| Rhizen                         | 0  | 4  | 0  | 1  | 0  | 2  | 0 | 0 | 0 | 0 | 0 | 0 | 0 | 0 |
| Orchid                         | 0  | 2  | 1  | 1  | 0  | 1  | 0 | 0 | 0 | 0 | 0 | 0 | 0 | 0 |
| Panacea                        | 2  | 0  | 1  | 0  | 0  | 0  | 0 | 0 | 0 | 0 | 1 | 0 | 0 | 0 |
| Connexios                      | 4  | 0  | 0  | 0  | 0  | 0  | 0 | 0 | 0 | 0 | 0 | 0 | 0 | 0 |
| Natco                          | 0  | 3  | 0  | 0  | 0  | 0  | 0 | 0 | 0 | 0 | 0 | 0 | 0 | 0 |
| Jubilant                       | 0  | 3  | 0  | 0  | 0  | 0  | 0 | 0 | 0 | 0 | 0 | 0 | 0 | 0 |
| Reliance Life Sciences         | 0  | 0  | 0  | 2  | 0  | 0  | 0 | 0 | 0 | 0 | 0 | 0 | 0 | 0 |
| Matrix Laboratories            | 1  | 0  | 0  | 1  | 0  | 0  | 0 | 0 | 0 | 0 | 0 | 0 | 0 | 0 |
| Hetero Drugs                   | 0  | 0  | 2  | 0  | 0  | 0  | 0 | 0 | 0 | 0 | 0 | 0 | 0 | 0 |
| Anthem                         | 0  | 2  | 0  | 0  | 0  | 0  | 0 | 0 | 0 | 0 | 0 | 0 | 0 | 0 |
| Kareus                         | 1  | 0  | 0  | 0  | 1  | 0  | 0 | 0 | 0 | 0 | 0 | 0 | 0 | 0 |
| Sphaera                        | 0  | 1  | 1  | 0  | 0  | 0  | 0 | 0 | 0 | 0 | 0 | 0 | 0 | 0 |
| Vyome                          | 0  | 0  | 2  | 0  | 0  | 0  | 0 | 0 | 0 | 0 | 0 | 0 | 0 | 0 |
| Krish Biotech                  | 1  | 0  | 0  | 1  | 0  | 0  | 0 | 0 | 0 | 0 | 0 | 0 | 0 | 0 |
| FDC Limited                    | 0  | 0  | 1  | 0  | 0  | 0  | 0 | 0 | 0 | 0 | 0 | 0 | 0 | 0 |
| JB Chemicals & Pharmaceuticals | 0  | 0  | 0  | 1  | 0  | 0  | 0 | 0 | 0 | 0 | 0 | 0 | 0 | 0 |
| Alkem                          | 0  | 0  | 0  | 0  | 0  | 0  | 0 | 0 | 1 | 0 | 0 | 0 | 0 | 0 |
| GVK Bio                        | 0  | 1  | 0  | 0  | 0  | 0  | 0 | 0 | 0 | 0 | 0 | 0 | 0 | 0 |
| Curadev                        | 0  | 1  | 0  | 0  | 0  | 0  | 0 | 0 | 0 | 0 | 0 | 0 | 0 | 0 |
| Shantani                       | 1  | 0  | 0  | 0  | 0  | 0  | 0 | 0 | 0 | 0 | 0 | 0 | 0 | 0 |
| Vitas                          | 0  | 0  | 1  | 0  | 0  | 0  | 0 | 0 | 0 | 0 | 0 | 0 | 0 | 0 |
| Invictus                       | 0  | 1  | 0  | 0  | 0  | 0  | 0 | 0 | 0 | 0 | 0 | 0 | 0 | 0 |
| Total :                        | 50 | 50 | 35 | 26 | 21 | 21 | 6 | 5 | 3 | 3 | 3 | 2 | 1 | 1 |

**e. Compounds by target class**

|                            | GPCR | Kinase (inhibition) | Nuclear signalling | Oxidoreductase | Phosphodiesterase | Ion channel | DNA Structure | Protease | Protein synt hesis | Immune check-point | Kinase (activation) | Deacetylase/demethylase | Cyclase | Cytokine | Transferase | Betalactamase | Bromodomain | Hydrolase | Transporter | Integrin | Chemical bond cleavage | Cholesterol transport | Synthase | Not available |
|----------------------------|------|---------------------|--------------------|----------------|-------------------|-------------|---------------|----------|--------------------|--------------------|---------------------|-------------------------|---------|----------|-------------|---------------|-------------|-----------|-------------|----------|------------------------|-----------------------|----------|---------------|
| Dr Reddy's                 | 0    | 0                   | 7                  | 3              | 0                 | 0           | 2             | 0        | 2                  | 0                  | 1                   | 0                       | 0       | 0        | 0           | 0             | 0           | 0         | 1           | 0        | 0                      | 1                     | 0        | 11            |
| Ranbaxy                    | 4    | 0                   | 0                  | 1              | 3                 | 0           | 0             | 2        | 2                  | 0                  | 0                   | 0                       | 0       | 0        | 1           | 0             | 0           | 0         | 0           | 1        | 0                      | 0                     | 0        | 2             |
| Torrent                    | 2    | 0                   | 1                  | 1              | 0                 | 0           | 0             | 1        | 0                  | 0                  | 0                   | 0                       | 1       | 0        | 0           | 0             | 0           | 0         | 0           | 0        | 1                      | 0                     | 0        | 0             |
| Wockhardt                  | 0    | 0                   | 0                  | 0              | 0                 | 0           | 6             | 1        | 4                  | 0                  | 0                   | 0                       | 0       | 0        | 0           | 1             | 0           | 0         | 0           | 0        | 0                      | 0                     | 0        | 4             |
| Piramal                    | 1    | 9                   | 2                  | 3              | 0                 | 0           | 0             | 0        | 1                  | 0                  | 0                   | 0                       | 2       | 1        | 1           | 0             | 0           | 0         | 0           | 0        | 0                      | 0                     | 0        | 0             |
| Sun                        | 3    | 2                   | 2                  | 0              | 0                 | 1           | 0             | 0        | 0                  | 0                  | 0                   | 0                       | 0       | 0        | 0           | 0             | 0           | 0         | 0           | 0        | 0                      | 0                     | 0        | 0             |
| Zydus Cadila               | 6    | 0                   | 4                  | 1              | 0                 | 0           | 1             | 1        | 0                  | 0                  | 1                   | 0                       | 0       | 0        | 0           | 0             | 0           | 0         | 0           | 0        | 0                      | 0                     | 0        | 1             |
| FDC Limited                | 0    | 0                   | 0                  | 0              | 0                 | 0           | 0             | 0        | 0                  | 0                  | 0                   | 0                       | 0       | 0        | 0           | 0             | 0           | 0         | 0           | 0        | 0                      | 0                     | 0        | 1             |
| JB Chem. & Pharmaceuticals | 0    | 0                   | 0                  | 1              | 0                 | 0           | 0             | 0        | 0                  | 0                  | 0                   | 0                       | 0       | 0        | 0           | 0             | 0           | 0         | 0           | 0        | 0                      | 0                     | 0        | 0             |
| Glenmark                   | 5    | 0                   | 0                  | 1              | 6                 | 4           | 0             | 2        | 0                  | 0                  | 0                   | 0                       | 0       | 0        | 0           | 0             | 0           | 0         | 0           | 0        | 0                      | 0                     | 1        | 0             |
| Lupin                      | 1    | 1                   | 1                  | 0              | 0                 | 2           | 0             | 0        | 0                  | 0                  | 0                   | 0                       | 0       | 0        | 0           | 0             | 0           | 0         | 0           | 0        | 0                      | 0                     | 0        | 2             |
| Reliance Life Sciences     | 0    | 0                   | 0                  | 0              | 0                 | 0           | 0             | 0        | 0                  | 0                  | 0                   | 0                       | 0       | 0        | 0           | 0             | 0           | 0         | 0           | 0        | 0                      | 0                     | 0        | 2             |
| Orchid                     | 0    | 0                   | 1                  | 0              | 1                 | 0           | 0             | 0        | 0                  | 0                  | 0                   | 1                       | 0       | 2        | 0           | 1             | 0           | 0         | 0           | 0        | 0                      | 0                     | 0        | 0             |
| Suven                      | 11   | 0                   | 0                  | 0              | 0                 | 3           | 0             | 0        | 0                  | 0                  | 0                   | 0                       | 0       | 0        | 0           | 0             | 0           | 0         | 0           | 0        | 0                      | 0                     | 0        | 1             |
| Natco                      | 0    | 3                   | 0                  | 0              | 0                 | 0           | 0             | 0        | 0                  | 0                  | 0                   | 0                       | 0       | 0        | 0           | 0             | 0           | 0         | 0           | 0        | 0                      | 0                     | 0        | 0             |
| Panacea                    | 0    | 0                   | 0                  | 0              | 0                 | 0           | 0             | 1        | 1                  | 0                  | 0                   | 0                       | 0       | 0        | 0           | 0             | 0           | 0         | 1           | 0        | 0                      | 0                     | 0        | 1             |
| Matrix Laboratories        | 0    | 0                   | 0                  | 0              | 1                 | 0           | 0             | 1        | 0                  | 0                  | 0                   | 0                       | 0       | 0        | 0           | 0             | 0           | 0         | 0           | 0        | 0                      | 0                     | 0        | 0             |
| Hetero Drugs               | 0    | 0                   | 0                  | 0              | 0                 | 0           | 0             | 0        | 0                  | 0                  | 0                   | 0                       | 0       | 0        | 0           | 0             | 0           | 0         | 0           | 0        | 0                      | 0                     | 0        | 2             |
| Jubilant                   | 0    | 1                   | 0                  | 0              | 0                 | 0           | 0             | 0        | 0                  | 0                  | 0                   | 2                       | 0       | 0        | 0           | 0             | 1           | 0         | 0           | 0        | 0                      | 0                     | 0        | 0             |
| Alkem                      | 0    | 0                   | 0                  | 0              | 0                 | 0           | 0             | 1        | 0                  | 0                  | 0                   | 0                       | 0       | 0        | 0           | 0             | 0           | 0         | 0           | 0        | 0                      | 0                     | 0        | 0             |

|               |    |    |    |    |    |    |    |    |    |   |   |   |   |   |   |   |   |   |   |   |   |   |   |    |
|---------------|----|----|----|----|----|----|----|----|----|---|---|---|---|---|---|---|---|---|---|---|---|---|---|----|
| Advinus       | 3  | 5  | 0  | 0  | 0  | 0  | 0  | 0  | 0  | 0 | 2 | 0 | 0 | 0 | 0 | 0 | 0 | 0 | 0 | 0 | 0 | 0 | 0 | 0  |
| Aurigene      | 0  | 3  | 1  | 1  | 0  | 0  | 0  | 0  | 0  | 6 | 0 | 0 | 0 | 0 | 1 | 0 | 1 | 1 | 0 | 0 | 0 | 0 | 0 | 0  |
| Anthem        | 0  | 0  | 0  | 0  | 0  | 0  | 0  | 0  | 0  | 0 | 0 | 2 | 0 | 0 | 0 | 0 | 0 | 0 | 0 | 0 | 0 | 0 | 0 | 0  |
| GVK Bio       | 0  | 1  | 0  | 0  | 0  | 0  | 0  | 0  | 0  | 0 | 0 | 0 | 0 | 0 | 0 | 0 | 0 | 0 | 0 | 0 | 0 | 0 | 0 | 0  |
| Kareus        | 0  | 0  | 0  | 0  | 0  | 0  | 0  | 0  | 0  | 0 | 1 | 0 | 0 | 0 | 0 | 0 | 0 | 0 | 0 | 0 | 0 | 0 | 0 | 1  |
| Connexios     | 1  | 0  | 1  | 1  | 0  | 0  | 0  | 0  | 0  | 0 | 1 | 0 | 0 | 0 | 0 | 0 | 0 | 0 | 0 | 0 | 0 | 0 | 0 | 0  |
| Rhizen        | 0  | 4  | 0  | 0  | 0  | 1  | 0  | 0  | 0  | 0 | 0 | 0 | 0 | 0 | 0 | 0 | 0 | 1 | 0 | 0 | 0 | 0 | 0 | 0  |
| Sphaera       | 1  | 2  | 0  | 0  | 0  | 0  | 0  | 0  | 0  | 0 | 0 | 0 | 0 | 0 | 0 | 0 | 0 | 0 | 0 | 0 | 0 | 0 | 0 | 0  |
| Curadev       | 0  | 0  | 0  | 1  | 0  | 0  | 0  | 0  | 0  | 0 | 0 | 0 | 0 | 0 | 0 | 0 | 0 | 0 | 0 | 0 | 0 | 0 | 0 | 0  |
| Shantani      | 0  | 0  | 0  | 0  | 0  | 0  | 0  | 0  | 0  | 0 | 0 | 0 | 0 | 0 | 0 | 0 | 0 | 0 | 0 | 0 | 0 | 0 | 0 | 1  |
| Vyome         | 0  | 0  | 0  | 0  | 0  | 0  | 0  | 0  | 0  | 0 | 0 | 0 | 0 | 0 | 0 | 0 | 0 | 0 | 0 | 0 | 0 | 0 | 0 | 2  |
| Vitas         | 0  | 0  | 0  | 1  | 0  | 0  | 0  | 0  | 0  | 0 | 0 | 0 | 0 | 0 | 0 | 0 | 0 | 0 | 0 | 0 | 0 | 0 | 0 | 0  |
| Invictus      | 0  | 0  | 0  | 0  | 0  | 0  | 1  | 0  | 0  | 0 | 0 | 0 | 0 | 0 | 0 | 0 | 0 | 0 | 0 | 0 | 0 | 0 | 0 | 0  |
| Krish Biotech | 1  | 0  | 1  | 0  | 0  | 0  | 0  | 0  | 0  | 0 | 0 | 0 | 0 | 0 | 0 | 0 | 0 | 0 | 0 | 0 | 0 | 0 | 0 | 0  |
| Total :       | 39 | 31 | 21 | 15 | 11 | 11 | 10 | 10 | 10 | 6 | 6 | 5 | 3 | 3 | 3 | 2 | 2 | 2 | 2 | 1 | 1 | 1 | 1 | 31 |

**f. Attrition and timelines**

|               |             |          |         |         |          |           |             |                |            |              |                 |            |              |                 |               |                 |                    |                                    |                            |                            |                            |
|---------------|-------------|----------|---------|---------|----------|-----------|-------------|----------------|------------|--------------|-----------------|------------|--------------|-----------------|---------------|-----------------|--------------------|------------------------------------|----------------------------|----------------------------|----------------------------|
| All compounds | Preclin max | Ph 1 max | Ph2 max | Ph3 max | Launched | PC-Ph1 OK | PC-Ph1 STOP | PC-Ph1 ongoing | Ph1-Ph2 OK | Ph1-Ph2 STOP | Ph1-Ph2 ongoing | Ph2-Ph3 OK | Ph2-Ph3 STOP | Ph2-Ph3 ongoing | Ph3-Launch OK | Ph3-Launch STOP | Ph3-Launch ongoing | Time preclinical to decision point | Time Ph1 to decision point | Time Ph2 to decision point | Time Ph3 to decision point |
| 214           | 132         | 48       | 30      | 3       | 1        | 82        | 81          | 51             | 34         | 29           | 19              | 4          | 19           | 11              | 1             | 2               | 1                  | 1,9                                | 2,5                        | 3,4                        | 3                          |

**5. Figure 7: Additional chemical structures from supporting information tables**

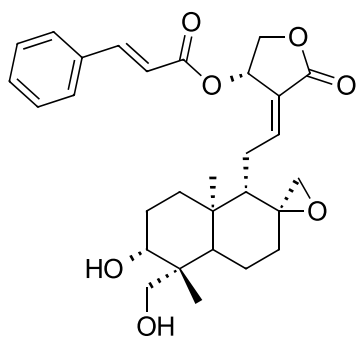

**40 – DRF 3188**

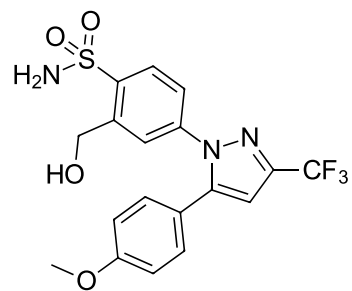

**41 – DRF 4367**

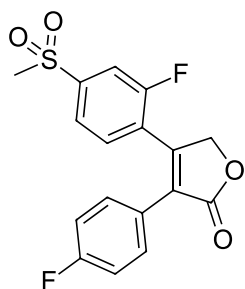

**42 – DRF 4848**

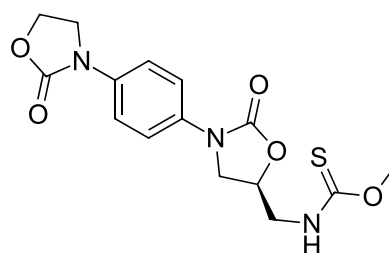

**43 – DRF 8417**

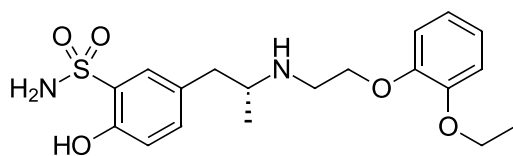

**44 – RBx 9001**

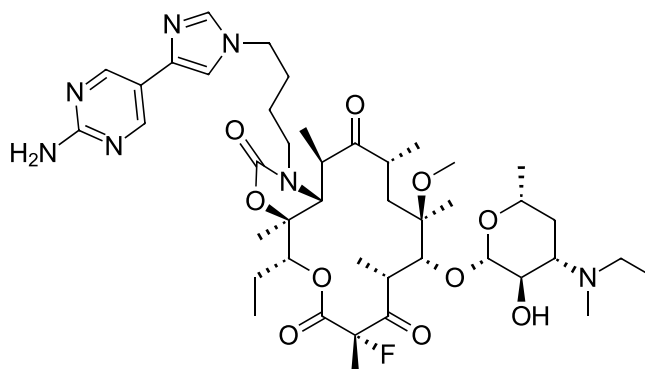

**45 – RBx 14255**

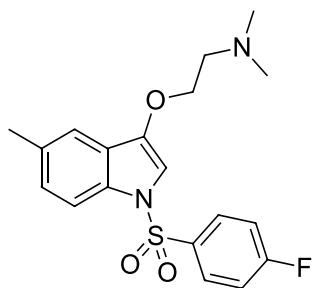

**46 – SUVN-504**

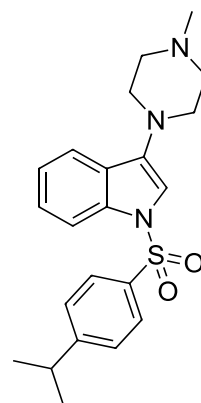

**47 – SUVN-507**



## 6. Bibliography: references relating to Supporting Information

- [395] *Drug Profile DRF-NPPC*, Adis Insight, (accessed Dec 12, 2016): <http://adisinsight.springer.com/drugs/800015101>
- [396] *DRF 3188 a Novel Semi-Synthetic Analog of Andrographolide: Cellular Response to MCF 7 Breast Cancer Cells*, C. Satyanarayana, D. S. Deevi, R. Rajagopalan, N. Srinivas, S. Rajagopal, *BMC Cancer* **2004**, *4*, 26.
- [397] *Pre-clinical Assessment of DRF 4367, a Novel COX-2 Inhibitor: Evaluation of Pharmacokinetics, Absolute Oral Bioavailability and Metabolism in Mice and Comparative Inter-Species In Vitro Metabolism*, R. Bhamidipati, S. Mujeeb, P. V. Dravid, A. A. Khan, S. K. Singh, Y. K. Rao, R. Mullangi, N. R. Srinivas, *Xenobiotica* **2005**, *35*, 253-271.
- [398] *Drug Profile DRF 4832*, Adis Insight, (accessed Dec 12, 2016): <http://adisinsight.springer.com/drugs/800018835>
- [399] *Validation of a Simple HPLC Method for DRF-4848, a Novel COX-2 Inhibitor Suitable for Pharmacokinetic Application in Rats*, R. R. Kallem, R. K. Trivedi, R. Mullangi, N. R. Srinivas, *Biomed. Chromatogr.* **2006**, *20*, 1289-1294.
- [400] *In Vitro and in Vivo Antibacterial Evaluation of DRF 8417, a New Oxazolidinone*, K. Sreenivas, P. V. S. Amarnath, A. Mallik, H. Sarnaik, N. S. Kumar, M. Takhi, S. Trehan, M. S. Kumar, J. Iqbal, R. Rajagopalan, R. Chakrabarti, *J. Antimicrob. Chemother.* **2007**, *60*, 159-161.
- [401] *Tamsulosin Derivative*, Y. Kumar, R. C. Aryan, R. Gowrishankar, K. H. Bhushan, A. Chugh, (Ranbaxy Laboratories Ltd., New Delhi, India), PCT Pat. Appl. WO2003/093227 A1, Nov 13, **2003**
- [402] *In Vitro and In Vivo Activities of the Novel Ketolide RBx 14255 against Clostridium difficile*, M. Kumar, T. Mathur, T. K. Barman, G. Ramkumar, A. Bhati, G. Shukla, V. Kalia, M. Pandya, V. S. Raj, D. J. Upadhyay, C. Vaishnavi, A. Chakrabarti, B. Das, P. K. Bhatnagar, *Antimicrob. Agents Chemother.* **2012**, *56*, 5986-5989.
- [403] *Bactericidal Activities of New Quinolones WCK 771A, WCK 919, and its Two Isomers WCK 1152, WCK 1153 Against Vancomycin Resistant Staphylococcus Aureus (VRSA)*, B. Bozdogan, P. C. Appelbaum, Forty-third Interscience Conference on Antimicrobial Agents and Chemotherapy, American Society for Microbiology, Washington, DC, USA, Chicago, IL, USA, **2003**, (accessed Dec 13, 2016): [http://wockhardt.discovery.com/wp-content/plugins/wp-pdf-stamper/stamped-files/F-438\\_56fe54666610b\\_e.pdf](http://wockhardt.discovery.com/wp-content/plugins/wp-pdf-stamper/stamped-files/F-438_56fe54666610b_e.pdf)
- [404] *Dual Targeting of Topoisomerase IV and Gyrase To Reduce Mutant Selection: Direct Testing of the Paradigm by Using WCK-1734, a New Fluoroquinolone, and Ciprofloxacin*, J. Strahilevitz, D. C. Hooper, *Antimicrob. Agents Chemother.* **2005**, *49*, 1949-1956.
- [405] *Gastric-sparing Nitric Oxide-Releasable 'True' Prodrugs of Aspirin and Naproxen*, M. Gund, P. Gaikwad, N. Borhade, A. Burhan, D. C. Desai, A. Sharma, M. Dhiman, M. Patil, J. Sheikh, G. Thakre, S. G. Tipparam, S. Sharma, K. V. S. Nemmani, A. Satyam, *Bioorg. Med. Chem. Lett.* **2014**, *24*, 5587-5592.
- [406] *Oral Bioavailability, Efficacy and Gastric Tolerability of P2026, a Novel Nitric Oxide-Releasing Diclofenac in Rat*, A. R. Pathan, M. Karwa, V. Pamidiboina, J. J. Deshattiwar, N. J. Deshmukh, P. P. Gaikwad, S. V. Mali, D. C. Desai, M. Dhiman, T. Thanga Mariappan, S. D. Sharma, A. Satyam, K. V. S. Nemmani, *Inflammopharmacology* **2010**, *18*, 157-168.
- [407] *Mode of Action of Antibiotic PM181104 on Bacteria*, G. Mahajan, P. Shanbhag, H. Sivarakrishnan, 1st Global Forum on Bacterial Infections, Delhi, India, Oct 3-5, **2011**, F1000Research, Accessed Dec 13, 2016, <https://f1000research.com/posters/1089863>
- [408] *Novel Benzopyran Compounds and Process for Their Preparation and Use*, H. V. Joshi, G. K. Deshmukh, M. J. Pawar, A. D. Lakdawala, G. Balasubramanian, (Glenmark Pharmaceuticals Ltd., Mumbai, India), PCT Pat. Appl. WO2003/014113 A1, Feb 20, **2003**
- [409] *GRC 9332 - a Novel, Efficacious, Small Molecular Weight SCD-1 Inhibitor in the Treatment of Obesity*, D. Shah, A. Thomas, V. S. P. R. Lingam, A. Raghuram, G. Gudi, S. Sharma, N. Khairatkar-Joshi, *Obesity* **2008**, *16*, 220-P.

- [410] *Glenmark's Prospective Obesity Drug Set for Phase I Trial in May*, The Hindu BusinessLine, Feb 14, **2006**, (accessed Dec 11, 2016): <http://www.thehindubusinessline.com/todays-paper/tp-corporate/glenmarks-prospective-obesity-drug-set-for-phase-i-trial-in-may/article1724853.ece>
- [411] *SUVN-501: Novel 5-HT<sub>6</sub> Receptor Antagonist Enhances Extracellular Levels of Acetylcholine – an In Vivo Brain Microdialysis Study*, R. V. S. Nirogi, V. N. Kandikere, K. Mudigonda, G. Bhyrapuneni, R. S. Omtri, N. Muddana, J. Reddy, 231st ACS National Meeting, Atlanta, GA, USA, March 26-30, **2006**, (accessed Dec 13, 2016): <http://oasys2.confex.com/acs/231nm/techprogram/P916699.HTM>
- [412] *SUVN-504: Potent and Selective High Brain Penetrating 5-HT<sub>6</sub> Receptor Antagonist*, G. Bhyrapuneni, N. Muddana, K. Mudigonda, V. N. Kandikere, R. V. S. Nirogi, 234th ACS National Meeting, Boston, MA, USA, Aug 19-23, **2007**, (accessed Dec 13, 2016): <http://oasys2.confex.com/acs/234nm/techprogram/P1105472.HTM>
- [413] *Drug Profile Serotonin 5-HT<sub>6</sub> Receptor Antagonists*, Adis Insight, (accessed Dec 13, 2016): <http://adisinsight.springer.com/drugs/800023674>
- [414] *Cognitive Enhancers (Nootropics). Part 1: Drugs Interacting with Receptors*, W. Froestl, A. Muhs, A. Pfeifer, *J. Alzheimer's Dis.* **2012**, 32, 793-887.
- [415] *SUVN-512: A Novel 5-HT<sub>6</sub> Receptor Antagonist With Drug-Like Properties*, M. R. Babu, R. Nirogi, R. Abraham, P. Jayarajan, V. Kandikere, N. R. Muddana, V. Benade, R. C. Palacharla, G. Bhyrapuneni, R. B. Vedamurthy, V. K. Goyal, A. Deshpande, P. Kothmirkar, *Alzheimer's Dementia*, 9, P816.
